# Supplementary material
Source: publisher figshare collection journal article supplement (https://acs.figshare.com/ndownloader/files/3928903)
Supplement: Supplementary file 1 [file 3928903]

## Supporting information

# Bis(imidazolidine)pyridine-NiCl<sub>2</sub> Catalyst for Nitro-Mannich Reaction of Isatin-derived *N*-Boc Ketimines: Asymmetric Synthesis of Chiral 3-Substituted 3-Amino-2-oxindoles

Takayoshi Arai,<sup>\*,†</sup> Eri Matsumura,<sup>†</sup> Hyuma Masu<sup>‡</sup>

<sup>†</sup>Department of Chemistry, Graduate School of Science, Chiba University  
1-33 Yayoi, Inage, Chiba 263-8522, Japan

<sup>‡</sup>Center for Analytical Instrumentation, Chiba University, Inage, Chiba  
263-8522, Japan

## Contents

|                                                                  |     |
|------------------------------------------------------------------|-----|
| 1. General                                                       | S3  |
| 2. General procedure for enantioselective nitro-Mannich reaction | S3  |
| 3. Optimization of reaction condition                            | S4  |
| 4. Analytical data for product of nitro-Mannich reaction         | S5  |
| 5. X-ray crystallographic analysis of <i>rac</i> - <b>2g</b>     | S11 |
| 6. Reduction of nitro group                                      | S12 |
| 7. Deprotection of Boc group                                     | S13 |
| 8. ESI-MS spectra                                                | S14 |
| 9. <sup>1</sup> H NMR and <sup>13</sup> C NMR spectra            | S16 |
| 10. HPLC data                                                    | S32 |

## 1. General

Dry solvents were purchased from commercial suppliers and used without further purification. Analytical thin-layer chromatography (TLC) was performed on glass plates coated with 0.25 mm 230-400 mesh silica gel containing a fluorescent indicator (Merck, #1.05715.0009). Silica gel column chromatography was performed on Kanto silica gel 60 (spherical, 100-210  $\mu\text{m}$ ).  $^1\text{H}$  NMR spectra were recorded on JEOL ECS-400 (400 MHz), ECA-500 (500 MHz) spectrometers. Chemical shifts of  $^1\text{H}$  NMR spectra were reported relative to tetramethylsilane ( $\delta$  0).  $^{13}\text{C}$  NMR spectra were recorded on JEOL ECS-400 (100 MHz), ECA-500 (125 MHz) spectrometers. Chemical shifts of  $^{13}\text{C}$  NMR spectra were reported relative to  $\text{CDCl}_3$  ( $\delta$  77.0), acetone- $\text{d}_6$  ( $\delta$  29.84) or  $\text{DMSO-}d_6$  ( $\delta$  39.52). Splitting patterns were reported as s, singlet; d, doublet; t, triplet; q, quartet; dd, double doublet; m, multiplet; br, broad.

General experimental details for synthesis of PyBidine ligand have been described.<sup>1)</sup> Substrates were synthesized according to known procedure.<sup>2, 3)</sup>

(1) Arai, T.; Mishiro, A.; Yokoyama, N.; Suzuki, K.; Sato, H. *J. Am. Chem. Soc.* **2010**, *132*, 5338.

(2) Hara, N.; Nakamura, S.; Sano, M.; Tamura, R.; Funahashi, Y.; Shibata, N. *Chem. Eur. J.* **2012**, *18*, 9276.

(3) Matestic, L.; Locke, J. M.; Vine, K. L.; Ranson, M.; Bremner, J. B.; Skropeta, D. *Tetrahedron* **2012**, *68*, 6810.

## 2. General procedure for enantioselective nitro-Mannich reaction

PyBidine (0.011 mmol) and  $\text{NiCl}_2$  (0.01 mmol) were added to a two-necked round-bottomed flask containing a stir bar under Ar. Dichloromethane (2.00 mL) was added to the flask and the mixture was stirred for 6 hours. After removal of the solvent under reduced pressure, toluene (1.00 mL) was added as a reaction solvent. To the resulting solution, nitromethane (2.00 mmol), DIPEA (0.02 mmol) and *N*-Boc ketimine (0.20 mmol) were added at 30  $^\circ\text{C}$ . After being stirred for appropriate time, the reaction mixture was quenched by water, extracted with ethyl acetate, dried with  $\text{Na}_2\text{SO}_4$ . After removal of the solvent under reduced pressure, the resulting crude mixture was purified by silica gel column chromatography to give the product. The enantiomeric excesses of the products were determined by chiral stationary phase HPLC by using Daicel Chiralcel OD-H and Chiralpak AD-H columns.

### 3. Optimization of reaction condition

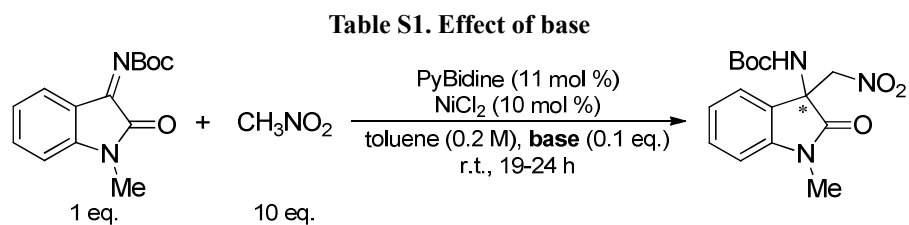

| entry    | base                           | yield (%) | ee (%)    |
|----------|--------------------------------|-----------|-----------|
| <b>1</b> | <b>DIPEA</b>                   | <b>99</b> | <b>95</b> |
| 2        | TEA                            | 99        | 95        |
| 3        | K <sub>2</sub> CO <sub>3</sub> | 92        | 79        |
| 4        | -                              | 31        | 90        |

#### 4. Analytical data for product of nitro-Mannich reaction

##### (*R*)-*tert*-butyl (1-methyl-3-(nitromethyl)-2-oxoindolin-3-yl)carbamate (**2a**)

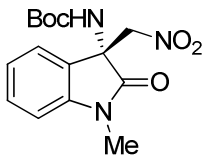

$^1\text{H}$  NMR (400 MHz,  $\text{CDCl}_3$ ):  $\delta$  1.32 (s, 9H), 3.28 (s, 3H), 4.60 (d,  $J$  = 12.2 Hz, 1H), 4.92 (d,  $J$  = 12.5 Hz, 1H), 5.96 (s, 1H), 6.90 (d,  $J$  = 7.0 Hz, 1H), 7.08-7.12 (m, 1H), 7.36-7.43 (m, 2H);  $^{13}\text{C}$  NMR (100 MHz,  $\text{CDCl}_3$ ):  $\delta$  26.86, 28.04, 59.79, 77.81, 81.18, 108.88, 123.47, 124.28, 125.82, 130.40, 143.25, 153.65, 172.64; HRMS (ESI+) calcd for  $\text{C}_{15}\text{H}_{18}\text{O}_5\text{N}_3$  ( $\text{M}-\text{H}^-$ ) 320.1252; found 320.1259; enantiomeric excess was determined by HPLC with a Chiralcel OD-H column (hexane:2-propanol = 90:10, 1.0 ml/min, 254 nm); minor enantiomer  $R_t$  = 10.1 min, major enantiomer  $R_t$  = 15.4 min;  $[\alpha]_D^{18}$  = -6.0 ( $c$  = 1.0,  $\text{CHCl}_3$ , 94% ee).

##### (*R*)-*tert*-butyl (1-benzyl-3-(nitromethyl)-2-oxoindolin-3-yl)carbamate (**2b**)

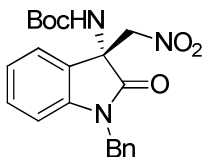

$^1\text{H}$  NMR (400 MHz,  $\text{CDCl}_3$ ):  $\delta$  1.36 (s, 9H), 4.66 (d,  $J$  = 12.2 Hz, 1H), 4.88 (d,  $J$  = 15.4 Hz, 1H), 4.97-5.07 (m, 2H), 5.92 (s, 1H), 6.77 (d,  $J$  = 7.9 Hz, 1H), 7.04-7.08 (m, 1H), 7.23-7.38 (m, 6H), 7.45 (d,  $J$  = 7.5 Hz, 1H);  $^{13}\text{C}$  NMR (100 MHz,  $\text{CDCl}_3$ ):  $\delta$  28.09, 44.51, 59.87, 77.76, 81.26, 109.95, 123.45, 124.47, 125.80, 127.34, 127.85, 128.89, 130.29, 135.02, 142.43, 153.74, 172.87; HRMS (ESI+) calcd for  $\text{C}_{21}\text{H}_{22}\text{O}_5\text{N}_3$  ( $\text{M}-\text{H}^-$ ) 396.1565; found 396.1572; enantiomeric excess was determined by HPLC with a Chiralpak AD-H column (hexane:2-propanol = 70:30, 1.0 ml/min, 254 nm); minor enantiomer  $R_t$  = 9.3 min, major enantiomer  $R_t$  = 16.4 min;  $[\alpha]_D^{20}$  = -5.9 ( $c$  = 1.0,  $\text{CHCl}_3$ , 84% ee).

##### (*R*)-*tert*-butyl (1-allyl-3-(nitromethyl)-2-oxoindolin-3-yl)carbamate (**2c**)

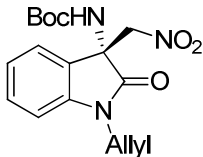

$^1\text{H}$  NMR (400 MHz,  $\text{CDCl}_3$ ):  $\delta$  1.35 (s, 9H), 4.28-4.33 (m, 1H), 4.47 (dd,  $J$  = 5.0, 16.3 Hz, 1H), 4.64 (d,  $J$  = 12.5 Hz, 1H), 5.00 (d,  $J$  = 12.5 Hz, 1H), 5.25-5.29 (m, 1H), 5.32-5.38 (m, 1H), 5.80-5.91 (m,

2H), 6.89 (d,  $J$  = 7.7 Hz, 1H), 7.06-7.11 (m, 1H), 7.32-7.36 (m, 1H), 7.47 (d,  $J$  = 7.5 Hz, 1H);  $^{13}\text{C}$  NMR (100 MHz,  $\text{CDCl}_3$ ):  $\delta$  28.09, 43.00, 59.75, 77.73, 81.22, 109.81, 118.28, 123.40, 124.58, 125.76, 130.29, 130.65, 142.54, 153.71, 172.54; HRMS (ESI+) calcd for  $\text{C}_{17}\text{H}_{20}\text{O}_5\text{N}_3$  (M-H) $^-$  346.1408: found 346.1421; enantiomeric excess was determined by HPLC with a Chiralcel OD-H column (hexane:2-propanol = 90:10, 1.0 ml/min, 254 nm); minor enantiomer  $R_t$  = 8.6 min, major enantiomer  $R_t$  = 10.9 min;  $[\alpha]_D^{21}$  = -4.8 ( $c$  = 1.0,  $\text{CHCl}_3$ , 84% ee).

**(*R*)-tert-butyl (1-acetyl-3-(nitromethyl)-2-oxoindolin-3-yl)carbamate (2d)**

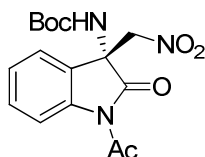

$^1\text{H}$  NMR (400 MHz,  $\text{CDCl}_3$ ):  $\delta$  1.30 (s, 9H), 2.71 (s, 3H), 4.68 (d,  $J$  = 12.5 Hz, 1H), 4.81 (d,  $J$  = 12.5 Hz, 1H), 6.18 (s, 1H), 7.22-7.26 (m, 1H), 7.33-7.35 (m, 1H), 7.41-7.46 (m, 1H), 8.28 (d,  $J$  = 8.4 Hz, 1H);  $^{13}\text{C}$  NMR (100 MHz,  $\text{CDCl}_3$ ):  $\delta$  26.60, 27.95, 60.19, 78.19, 81.98, 117.04, 122.98, 125.06, 125.87, 130.86, 139.88, 153.49, 170.40, 173.53; HRMS (ESI+) calcd for  $\text{C}_{16}\text{H}_{18}\text{O}_6\text{N}_3$  (M-H) $^-$  348.1201: found 348.1210; enantiomeric excess was determined by HPLC with a Chiralcel OD-H column (hexane:2-propanol = 90:10, 1.0 ml/min, 254 nm); major enantiomer  $R_t$  = 13.5 min, minor enantiomer  $R_t$  = 23.7 min;  $[\alpha]_D^{22}$  = -11.5 ( $c$  = 0.5,  $\text{CHCl}_3$ , 57% ee).

**(*R*)-tert-butyl (5-fluoro-1-methyl-3-(nitromethyl)-2-oxoindolin-3-yl)carbamate (2e)**

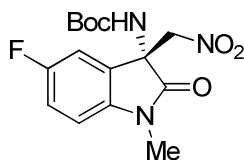

$^1\text{H}$  NMR (400 MHz,  $\text{CDCl}_3$ ):  $\delta$  1.35 (s, 9H), 3.27 (s, 3H), 4.62 (d,  $J$  = 12.5 Hz, 1H), 4.96 (d,  $J$  = 12.5 Hz, 1H), 5.90 (s, 1H), 6.84 (dd,  $J$  = 4.1, 8.6 Hz, 1H), 7.07-7.12 (m, 1H), 7.24-7.27 (m, 1H);  $^{13}\text{C}$  NMR (100 MHz,  $\text{CDCl}_3$ ):  $\delta$  27.01, 28.05, 59.87, 77.43, 81.48, 109.53 (d,  $J$  = 7.6 Hz), 112.97 (d,  $J$  = 24.8 Hz), 116.75 (d,  $J$  = 22.9 Hz), 127.29 (d,  $J$  = 6.7 Hz), 139.31, 153.67, 159.41 (d,  $J$  = 242.2 Hz), 172.44; HRMS (ESI+) calcd for  $\text{C}_{15}\text{H}_{17}\text{O}_5\text{N}_3\text{F}$  (M-H) $^-$  338.1158: found 338.1169; enantiomeric excess was determined by HPLC with a Chiralpak AD-H column (hexane:2-propanol = 80:20, 1.0 ml/min, 254 nm); major enantiomer  $R_t$  = 12.4 min, minor enantiomer  $R_t$  = 14.9 min;  $[\alpha]_D^{19}$  = -2.5 ( $c$  = 1.0,  $\text{CHCl}_3$ , 82% ee).

**(R)-tert-butyl (5-chloro-1-methyl-3-(nitromethyl)-2-oxoindolin-3-yl)carbamate (2f)**

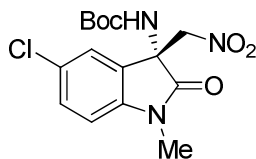

$^1\text{H}$  NMR (400 MHz,  $\text{CDCl}_3$ ):  $\delta$  1.36 (s, 9H), 3.27 (s, 3H), 4.60 (d,  $J$ = 12.7 Hz, 1H), 4.93 (d,  $J$ = 12.7 Hz, 1H), 5.87 (s, 1H), 6.83 (d,  $J$ = 8.2 Hz, 1H), 7.35-7.38 (m, 1H), 7.44 (s, 1H);  $^{13}\text{C}$  NMR (100 MHz,  $\text{CDCl}_3$ ):  $\delta$  27.00, 28.06, 59.69, 77.42, 81.55, 109.88, 124.93, 127.41, 128.91, 130.37, 141.92, 153.63, 172.29; HRMS (ESI+) calcd for  $\text{C}_{15}\text{H}_{17}\text{O}_5\text{N}_3\text{Cl}$  (M-H) $^-$  354.0862; found 354.0873; enantiomeric excess was determined by HPLC with a Chiralcel OD-H column (hexane:2-propanol= 90:10, 1.0 ml/min, 254 nm); minor enantiomer  $R_t$ = 14.4 min, major enantiomer  $R_t$ = 20.4 min;  $[\alpha]_D^{20}$ = -19.4 ( $c$ = 1.0,  $\text{CHCl}_3$ , 88% ee).

**(R)-tert-butyl (5-bromo-1-methyl-3-(nitromethyl)-2-oxoindolin-3-yl)carbamate (2g)**

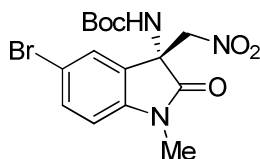

$^1\text{H}$  NMR (400 MHz,  $\text{CDCl}_3$ ):  $\delta$  1.35 (s, 9H), 3.26 (s, 3H), 4.62 (d,  $J$ = 12.5 Hz, 1H), 4.92 (d,  $J$ = 12.7 Hz, 1H), 6.01 (s, 1H), 6.79 (d,  $J$ = 8.2 Hz, 1H), 7.49-7.52 (m, 1H), 7.56 (s, 1H);  $^{13}\text{C}$  NMR (100 MHz,  $\text{CDCl}_3$ ):  $\delta$  26.92, 28.02, 59.59, 77.38, 81.50, 110.33, 116.01, 127.48, 127.76, 133.24, 142.41, 153.60, 172.18; HRMS (ESI+) calcd for  $\text{C}_{15}\text{H}_{17}\text{O}_5\text{N}_3\text{Br}$  (M-H) $^-$  398.0357; found 398.0367; enantiomeric excess was determined by HPLC with a Chiralpak AD-H column (hexane:2-propanol= 90:10, 1.0 ml/min, 254 nm); major enantiomer  $R_t$ = 25.5 min, minor enantiomer  $R_t$ = 29.5 min;  $[\alpha]_D^{18}$ = -27.8 ( $c$ = 1.0,  $\text{CHCl}_3$ , 80% ee).

**(R)-tert-butyl (6-chloro-1-methyl-3-(nitromethyl)-2-oxoindolin-3-yl)carbamate (2h)**

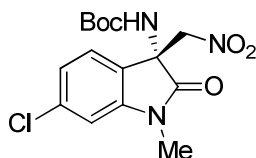

$^1\text{H}$  NMR (400 MHz,  $\text{CDCl}_3$ ):  $\delta$  1.34 (s, 9H), 3.27 (s, 3H), 4.57 (d,  $J$ = 12.2 Hz, 1H), 4.94 (d,  $J$ = 12.5 Hz, 1H), 5.87 (s, 1H), 6.91 (d,  $J$ = 1.6 Hz, 1H), 7.07 (dd,  $J$ = 1.8, 7.9 Hz, 1H), 7.36 (d,  $J$ = 7.9 Hz, 1H);  $^{13}\text{C}$  NMR (100 MHz,  $\text{CDCl}_3$ ):  $\delta$  27.00, 28.05, 59.41, 77.56, 81.46, 109.75, 123.32, 124.09, 125.43, 136.40, 144.55, 153.62, 172.66; HRMS (ESI+) calcd for  $\text{C}_{15}\text{H}_{17}\text{O}_5\text{N}_3\text{Cl}$  (M-H) $^-$  354.0862; found 354.0872; enantiomeric excess was determined by HPLC with a Chiralcel OD-H column

(hexane:2-propanol= 90:10, 1.0 ml/min, 254 nm); minor enantiomer  $R_t$ = 13.3 min, major enantiomer  $R_t$ = 20.7 min;  $[\alpha]_D^{20}$  = +5.7 ( $c$ = 1.0,  $\text{CHCl}_3$ , 86% ee).

**(*R*)-tert-butyl (6-bromo-1-methyl-3-(nitromethyl)-2-oxoindolin-3-yl)carbamate (2i)**

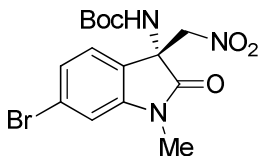

$^1\text{H}$  NMR (400 MHz,  $\text{CDCl}_3$ ):  $\delta$  1.34 (s, 9H), 3.26 (s, 3H), 4.57 (d,  $J$ = 12.5 Hz, 1H), 4.94 (d,  $J$ = 12.5 Hz, 1H), 5.92 (s, 1H), 7.06 (d,  $J$ = 1.6 Hz, 1H), 7.23 (dd,  $J$ = 1.6, 7.9 Hz, 1H), 7.30 (d,  $J$ = 8.2 Hz, 1H);  $^{13}\text{C}$  NMR (100 MHz,  $\text{CDCl}_3$ ):  $\delta$  27.00, 28.05, 59.47, 77.48, 81.48, 112.52, 124.27, 124.64, 125.70, 126.28, 144.62, 153.61, 172.54; HRMS (ESI+) calcd for  $\text{C}_{15}\text{H}_{17}\text{O}_5\text{N}_3\text{Br}$  ( $\text{M}-\text{H}$ ) $^-$  398.0357; found 398.0374; enantiomeric excess was determined by HPLC with a Chiralpak AD-H column (hexane:2-propanol= 90:10, 1.0 ml/min, 254 nm); major enantiomer  $R_t$ = 16.3 min, minor enantiomer  $R_t$ = 18.4 min;  $[\alpha]_D^{22}$  = +9.3 ( $c$ = 1.0,  $\text{CHCl}_3$ , 81% ee).

**(*R*)-tert-butyl (7-bromo-1-methyl-3-(nitromethyl)-2-oxoindolin-3-yl)carbamate (2j)**

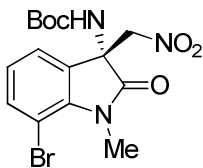

$^1\text{H}$  NMR (400 MHz,  $\text{CDCl}_3$ ):  $\delta$  1.33 (s, 9H), 3.66 (s, 3H), 4.54 (d,  $J$ = 12.5 Hz, 1H), 4.87 (d,  $J$ = 12.5 Hz, 1H), 6.03 (s, 1H), 6.92-6.96 (m, 1H), 7.30 (d,  $J$ = 7.3 Hz, 1H), 7.49 (dd,  $J$ = 1.1, 8.2 Hz, 1H);  $^{13}\text{C}$  NMR (100 MHz,  $\text{CDCl}_3$ ):  $\delta$  28.04, 30.61, 59.35, 77.84, 81.52, 103.25, 122.95, 124.55, 128.97, 136.07, 140.60, 153.49, 173.21; HRMS (ESI+) calcd for  $\text{C}_{15}\text{H}_{17}\text{O}_5\text{N}_3\text{Br}$  ( $\text{M}-\text{H}$ ) $^-$  398.0357; found 398.0373; enantiomeric excess was determined by HPLC with a Chiralpak AD-H column (hexane:2-propanol= 90:10, 1.0 ml/min, 254 nm); minor enantiomer  $R_t$ = 22.5 min, major enantiomer  $R_t$ = 40.7 min;  $[\alpha]_D^{20}$  = +18.2 ( $c$ = 1.0,  $\text{CHCl}_3$ , 78% ee).

**(*R*)-tert-butyl (1,5-dimethyl-3-(nitromethyl)-2-oxoindolin-3-yl)carbamate (2k)**

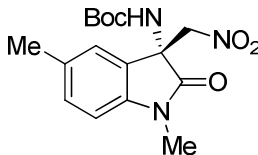

$^1\text{H}$  NMR (400 MHz,  $\text{CDCl}_3$ ):  $\delta$  1.33 (s, 9H), 2.33 (s, 3H), 3.26 (s, 3H), 4.58 (d,  $J$ = 12.5 Hz, 1H), 4.90 (d,  $J$ = 12.5 Hz, 1H), 5.91 (s, 1H), 6.79 (d,  $J$ = 7.9 Hz, 1H), 7.16-7.19 (m, 1H), 7.22 (s, 1H);  $^{13}\text{C}$



NMR (100 MHz, CDCl<sub>3</sub>):  $\delta$  21.07, 26.87, 28.05, 59.89, 77.86, 81.10, 108.63, 124.93, 125.83, 130.64, 133.18, 140.82, 153.67, 172.54; HRMS (ESI+) calcd for C<sub>16</sub>H<sub>20</sub>O<sub>5</sub>N<sub>3</sub> (M-H)<sup>-</sup> 334.1408; found 334.1420; enantiomeric excess was determined by HPLC with a Chiralcel OD-H column (hexane:2-propanol= 90:10, 1.0 ml/min, 254 nm); minor enantiomer Rt= 11.8 min, major enantiomer Rt= 14.7 min;  $[\alpha]_D^{21}$  = -20.4 (*c*= 1.0, CHCl<sub>3</sub>, 95% ee).

**(*R*)-tert-butyl (5-methoxy-1-methyl-3-(nitromethyl)-2-oxoindolin-3-yl)carbamate (2l)**

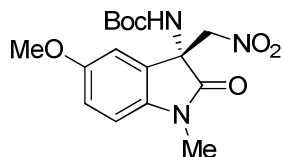

<sup>1</sup>H NMR (400 MHz, CDCl<sub>3</sub>):  $\delta$  1.34 (s, 9H), 3.26 (s, 3H), 3.78 (s, 3H), 4.59 (d, *J*= 12.5 Hz, 1H), 4.93 (d, *J*= 12.2 Hz, 1H), 5.89 (s, 1H), 6.81 (d, *J*= 8.4 Hz, 1H), 6.89-6.91 (m, 1H), 7.06 (s, 1H); <sup>13</sup>C NMR (100 MHz, CDCl<sub>3</sub>):  $\delta$  26.91, 28.05, 55.85, 60.09, 77.75, 81.17, 109.35, 111.51, 114.86, 127.03, 136.53, 153.68, 156.47, 172.32; HRMS (ESI+) calcd for C<sub>16</sub>H<sub>20</sub>O<sub>6</sub>N<sub>3</sub> (M-H)<sup>-</sup> 350.1358; found 350.1368; enantiomeric excess was determined by HPLC with a Chiralcel OD-H column (hexane:2-propanol= 90:10, 1.0 ml/min, 254 nm); minor enantiomer Rt= 18.6 min, major enantiomer Rt= 21.0 min;  $[\alpha]_D^{21}$  = -22.6 (*c*= 1.0, CHCl<sub>3</sub>, 92% ee).

**(*R*)-tert-butyl**

**(1-(nitromethyl)-2-oxo-2,4,5,6-tetrahydro-1H-pyrrolo[3,2-*ij*]quinolin-1-yl)carbamate**

**(2m)**

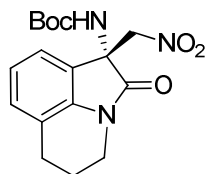

<sup>1</sup>H NMR (400 MHz, CDCl<sub>3</sub>):  $\delta$  1.35 (s, 9H), 1.96-2.13 (m, 2H), 2.78-2.81 (m, 2H), 3.69-3.84 (m, 2H), 4.65 (d, *J*= 12.5 Hz, 1H), 4.99 (d, *J*= 12.2 Hz, 1H), 5.84 (s, 1H), 6.96-6.99 (m, 1H), 7.12 (dd, *J*= 0.7, 7.7 Hz, 1H), 7.24-7.30 (m, 1H); <sup>13</sup>C NMR (100 MHz, CDCl<sub>3</sub>):  $\delta$  20.81, 24.35, 28.10, 39.30, 60.89, 77.64, 81.02, 120.86, 122.58, 122.87, 124.42, 129.24, 139.10, 153.78, 171.44; HRMS (ESI+) calcd for C<sub>17</sub>H<sub>20</sub>O<sub>5</sub>N<sub>3</sub> (M-H)<sup>-</sup> 346.1408; found 346.1422; enantiomeric excess was determined by HPLC with a Chiralcel OD-H column (hexane:2-propanol= 80:20, 1.0 ml/min, 254 nm); minor enantiomer Rt= 7.7 min, major enantiomer Rt= 13.4 min;  $[\alpha]_D^{23}$  = +13.0 (*c*= 1.0, CHCl<sub>3</sub>, 94% ee).

***tert*-butyl (1-methyl-3-(1-nitroethyl)-2-oxoindolin-3-yl)carbamate (2n)**

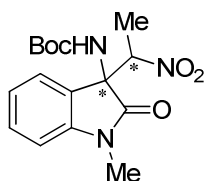

**major diastereomer:**  $^1\text{H}$  NMR (400 MHz,  $\text{CDCl}_3$ ):  $\delta$  1.28 (s, 9H), 1.74 (d,  $J$ = 6.8 Hz, 3H), 3.26 (s, 3H), 4.66-4.68 (m, 1H), 6.11 (s, 1H), 6.88 (d,  $J$ = 7.9 Hz, 1H), 7.04-7.11 (m, 1H), 7.15-7.18 (m, 1H), 7.34-7.40 (m, 1H);  $^{13}\text{C}$  NMR (100 MHz,  $\text{CDCl}_3$ , 80/20 diastereomixture):  $\delta$  12.80, 13.02, 26.65, 26.75, 27.96, 29.62, 61.83, 62.74, 80.92, 84.66, 85.44, 108.41, 108.63, 122.96, 123.19, 123.36, 124.07, 126.92, 130.15, 130.25, 143.05, 144.00, 153.27, 153.78, 172.17, 173.11; HRMS (ESI+) calcd for  $\text{C}_{16}\text{H}_{20}\text{O}_5\text{N}_3$  (M-H) $^-$  334.1408; found 334.1420; enantiomeric excess was determined by HPLC with a Chiralcel OD-H column (hexane:2-propanol= 90:10, 1.0 ml/min, 254 nm); minor enantiomer  $R_t$ = 9.2 min, major enantiomer  $R_t$ = 22.8 min;  $[\alpha]_D^{22}$ = -40.2 ( $c$ = 1.0,  $\text{CHCl}_3$ , 80/20 diastereomixture, 90% ee).

**minor diastereomer:**  $^1\text{H}$  NMR (400 MHz,  $\text{CDCl}_3$ ):  $\delta$  1.29 (s, 9H), 1.74 (d,  $J$ = 6.8 Hz, 3H), 3.26 (s, 3H), 4.98-5.03 (m, 1H), 6.11 (s, 1H), 6.88 (d,  $J$ = 7.9 Hz, 1H), 7.04-7.11 (m, 1H), 7.15-7.18 (m, 1H), 7.34-7.40 (m, 1H); enantiomeric excess was determined by HPLC with a Chiralcel OD-H column (hexane:2-propanol= 90:10, 1.0 ml/min, 254 nm); minor enantiomer  $R_t$ = 7.7 min, major enantiomer  $R_t$ = 16.4 min.

## 5. X-ray crystallographic analysis of *rac*-**2g**

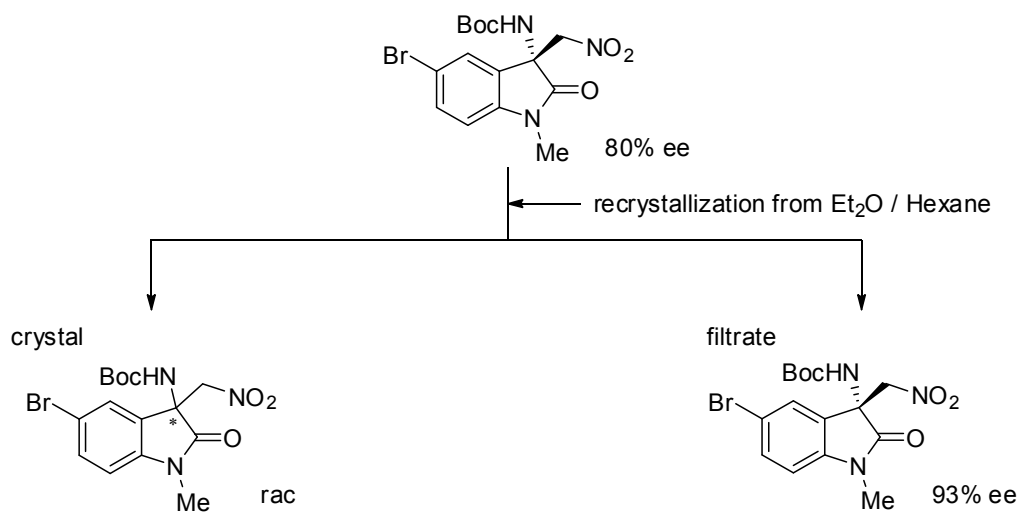

Scheme S1. Recrystallization of nitro-Mannich product **2g**

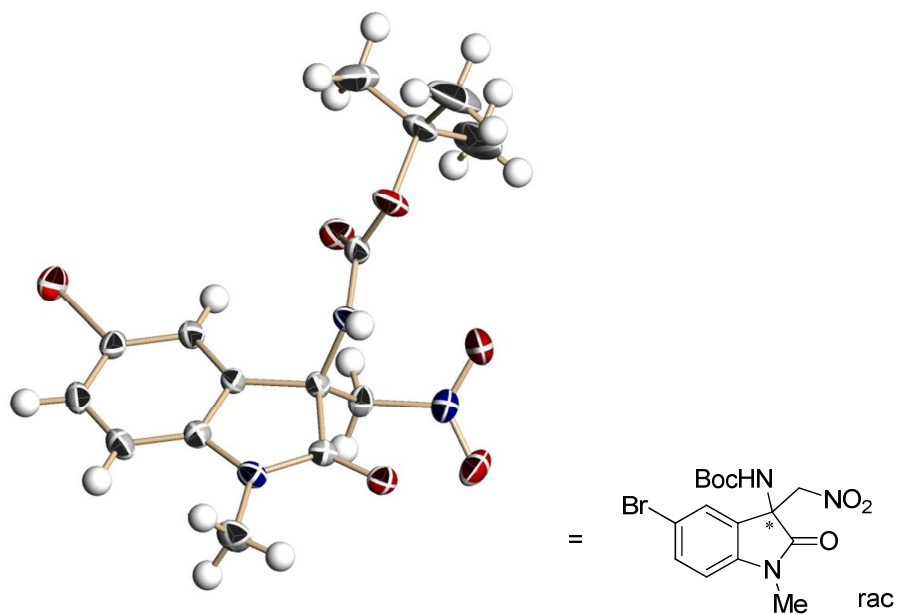

Figure S1. X-ray structure of *rac*. nitro-Mannich product **2g**

## 6. Reduction of nitro group

*Tert*-butyl (1-methyl-3-(nitromethyl)-2-oxoindolin-3-yl)carbamate (**2a**, 0.19 mmol) and NiCl<sub>2</sub>·6H<sub>2</sub>O (0.19 mmol) were added to a two-necked round-bottomed flask containing a stir bar under Ar. Methanol (1.90 mL) was added to the flask and the mixture was stirred at 0 °C. Sodium borohydride (2.28 mmol) was added and stirred for 40 min at 0 °C. The reaction mixture was quenched by saturated NH<sub>4</sub>Cl aq., extracted with dichloromethane, dried with Na<sub>2</sub>SO<sub>4</sub>. The resulting solution was concentrated under reduced pressure to afford adduct. The enantiomeric excesses of the products were determined by chiral stationary phase HPLC by using Daicel Chiralpak AS-H column.

### (*R*)-*tert*-butyl (3-(aminomethyl)-1-methyl-2-oxoindolin-3-yl)carbamate

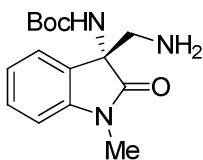

<sup>1</sup>H NMR (400 MHz, CDCl<sub>3</sub>): δ 1.24 (s, 9H), 2.95 (s, 2H), 3.24 (s, 3H), 5.96 (s, 1H), 6.85 (d, *J*= 7.7 Hz, 1H), 7.05-7.09 (m, 1H), 7.26-7.33 (m, 2H); <sup>13</sup>C NMR (100 MHz, CDCl<sub>3</sub>): δ 26.23, 27.87, 48.21, 62.35, 79.99, 108.01, 122.26, 122.51, 128.70, 130.12, 143.17, 154.47, 176.48; HRMS (ESI+) calcd for C<sub>15</sub>H<sub>22</sub>O<sub>3</sub>N<sub>3</sub> (M+H)<sup>+</sup> 292.1656; found 292.1651; enantiomeric excess was determined by HPLC with a Chiralpak AS-H column (hexane:2-propanol= 90:10, 1.0 ml/min, 254 nm); major enantiomer Rt= 13.9 min, minor enantiomer Rt= 19.6 min; [α]<sub>D</sub><sup>21</sup>= -28.2 (*c*= 1.0, CHCl<sub>3</sub>, 97% ee).

## 7. Deprotection of Boc group

*Tert*-butyl (5-bromo-1-methyl-3-(nitromethyl)-2-oxindolin-3-yl)carbamate (**2g**, 0.17 mmol) was added to a round-bottomed flask containing a stir bar under air. Dichloromethane (3.40 mL) was added to the flask and the mixture was stirred at 0 °C. TFA (1.70 mL) was added and stirred for 30 min at 0 °C. The reaction mixture was concentrated under reduced pressure and azeotroped with toluene. The resulting crude mixture was purified by silica gel column chromatography to give the product. The enantiomeric excesses of the products were determined by chiral stationary phase HPLC by using Daicel Chiralcel OD-H column.

### (*R*)-3-amino-5-bromo-1-methyl-3-(nitromethyl)indolin-2-one

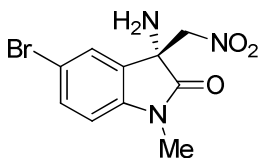

$^1\text{H}$  NMR (400 MHz,  $\text{CDCl}_3$ ):  $\delta$  3.25 (s, 3H), 4.78-4.78 (m, 2H), 6.78-6.80 (m, 1H), 7.50-7.53 (m, 2H);  $^{13}\text{C}$  NMR (100 MHz,  $\text{CDCl}_3$ ):  $\delta$  26.69, 58.93, 79.11, 110.45, 115.92, 127.24, 129.29, 133.37, 142.82, 176.09; HRMS (ESI+) calcd for  $\text{C}_{10}\text{H}_{11}\text{O}_3\text{N}_3\text{Br}$  ( $\text{M}+\text{H}$ ) $^+$  299.9978; found 299.9978; enantiomeric excess was determined by HPLC with a Chiralcel OD-H column (hexane:2-propanol=70:30, 1.0 ml/min, 254 nm); minor enantiomer  $R_t$ = 19.6 min, major enantiomer  $R_t$ = 29.7 min;  $[\alpha]_D^{19}$  = -60.4 ( $c$ = 1.0,  $\text{CHCl}_3$ , 81% ee).

## 8. ESI-MS spectra

### ESI-MS of PyBidine-NiCl<sub>2</sub> complex

HRMS (ESI+) calcd for [PyBidine-NiCl]<sup>+</sup> (C<sub>49</sub>H<sub>45</sub>N<sub>5</sub>ClNi) 796.2711: found 796.2708.

\\Hhww3\data\...131119\_3697\_2\_01

11/19/2013 10:10:30 AM

131119\_3697\_2\_01 #9 RT: 0.13 AV: 1 NL: 1.39E7  
T: FTMS {1,1} + p ESI Full ms [150.00-2000.00]

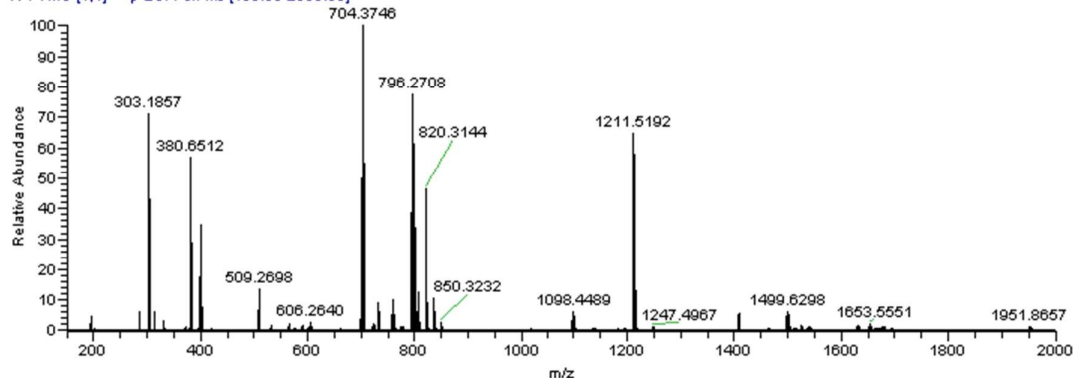

131119\_3697\_2\_01 #9 RT: 0.13 AV: 1 NL: 1.08E7  
T: FTMS {1,1} + p ESI Full ms [150.00-2000.00]

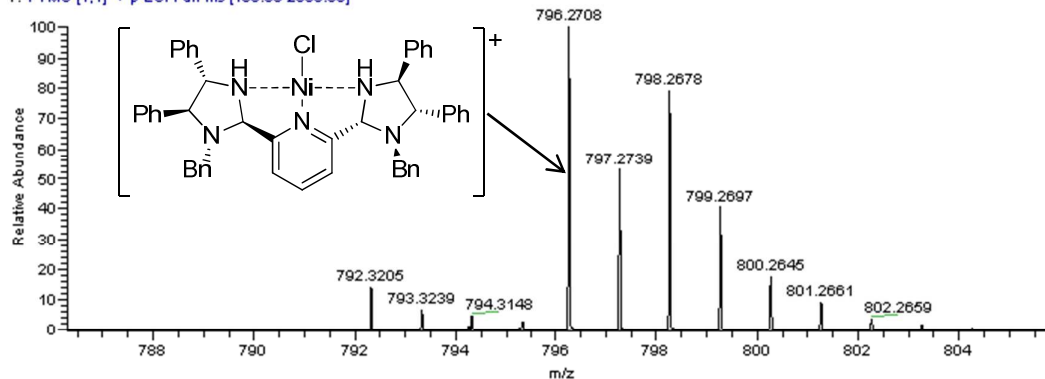

C49H45N5ClNi: C49 H45 N5 Cl1 Ni1 pa Chrg 1

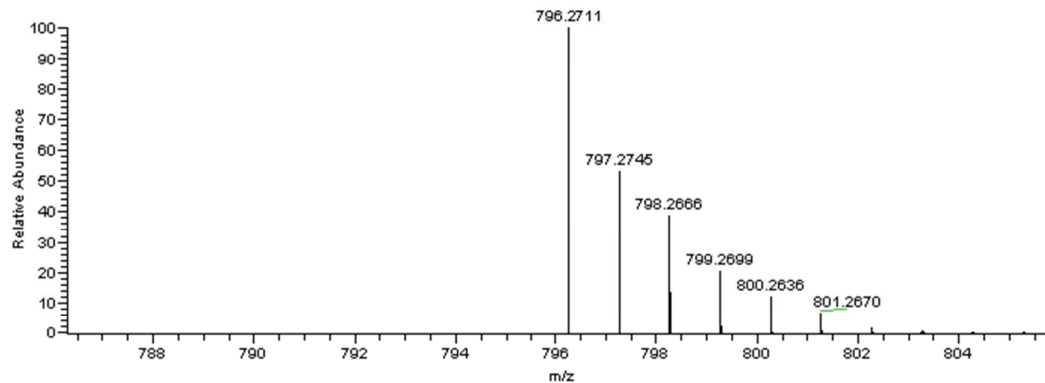

# ESI-MS of PyBidine-NiCl<sub>2</sub> complex with isatin-derived *N*-Boc ketimine

HRMS (ESI+) calcd for [PyBidine-NiCl + ketimine]<sup>+</sup> (C<sub>63</sub>H<sub>61</sub>O<sub>3</sub>N<sub>7</sub>ClNi) 1056.3872: found 1056.3870.

\\hwwg\data\...131128\131128\_3697\_04

11/28/2013 1:15:28 PM

131128\_3697\_04 #9 RT: 0.13 AV: 1 NL: 2.22E7

T: FTMS {1,1} + p ESI Full ms [150.00-2000.00]

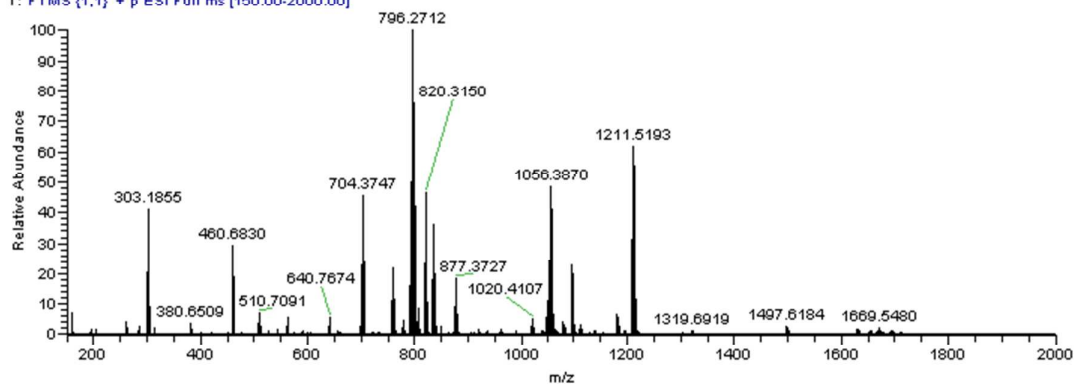

131128\_3697\_04 #9 RT: 0.13 AV: 1 NL: 1.07E7

T: FTMS {1,1} + p ESI Full ms [150.00-2000.00]

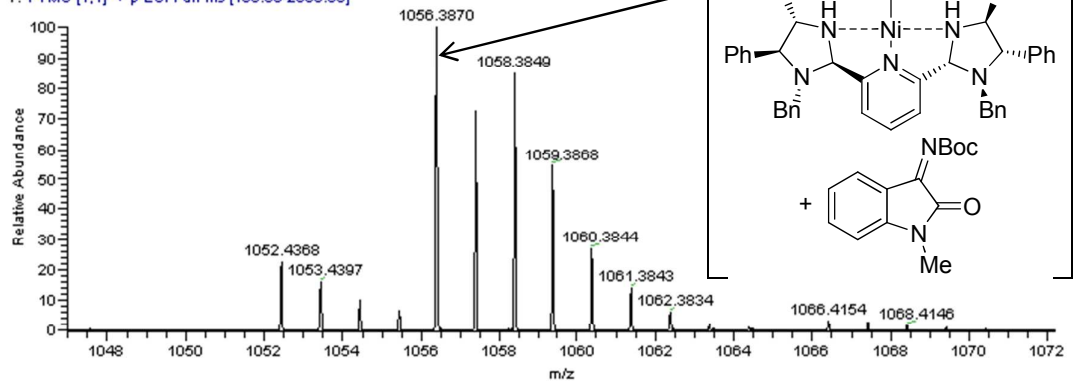

C63H61O3N7ClNi: C63 H61 O3 N7 Cl1 Ni1 pa Chrg 1

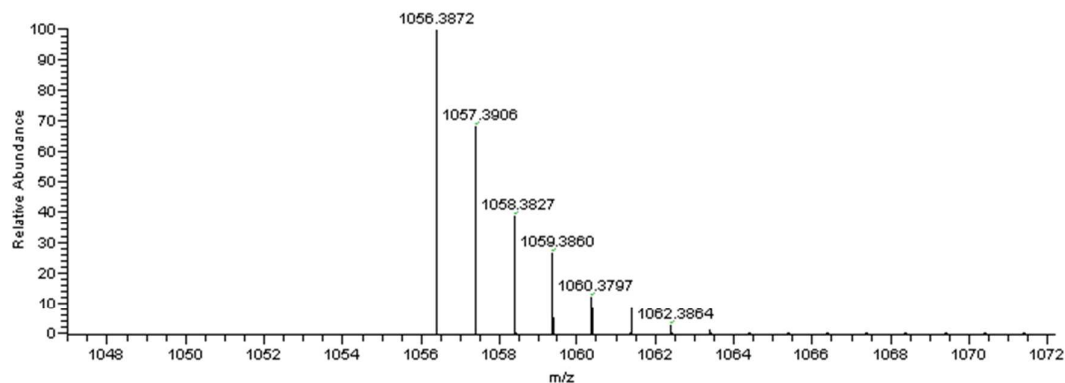

# 9. $^1\text{H}$ NMR and $^{13}\text{C}$ NMR spectra

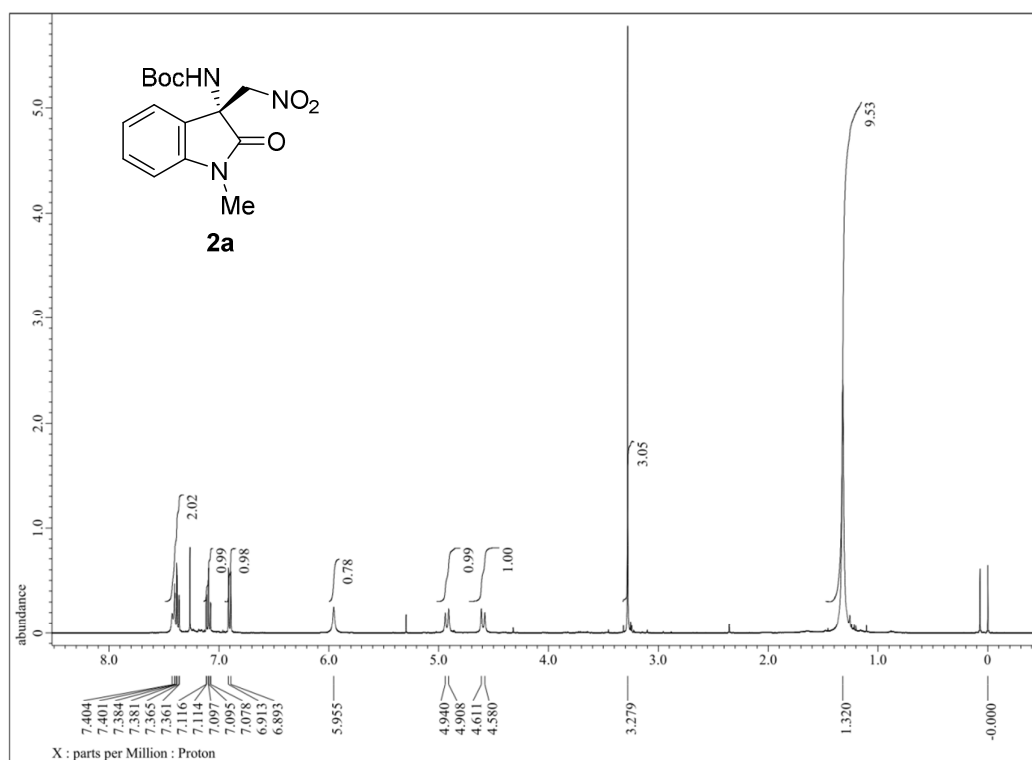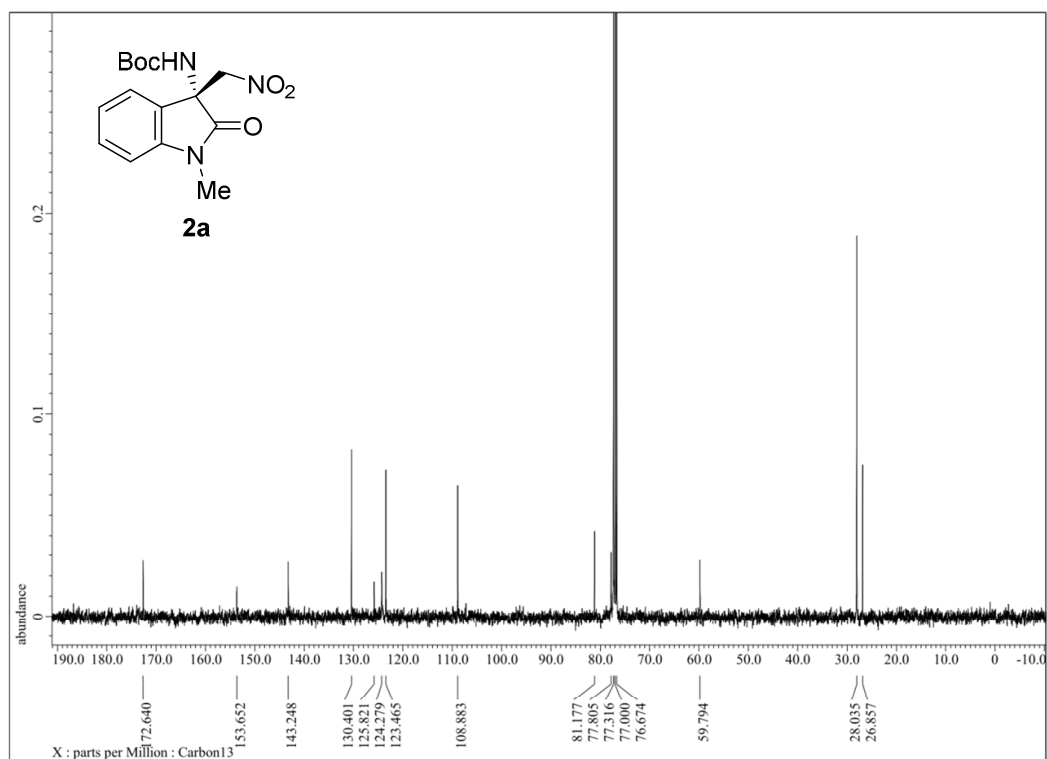



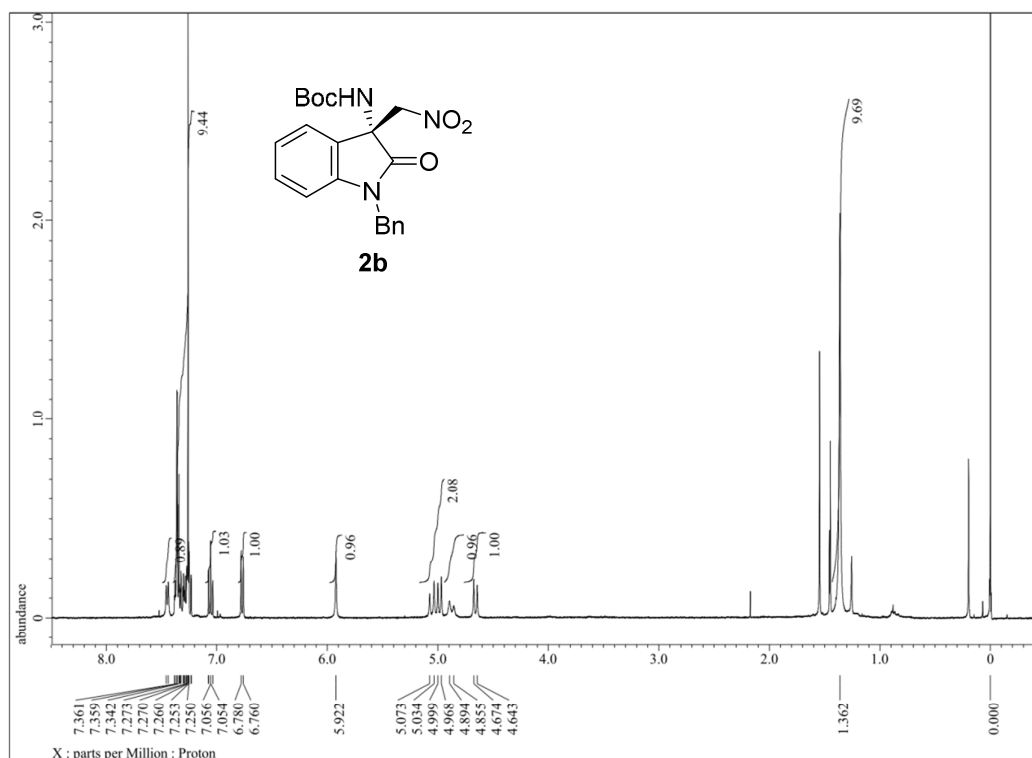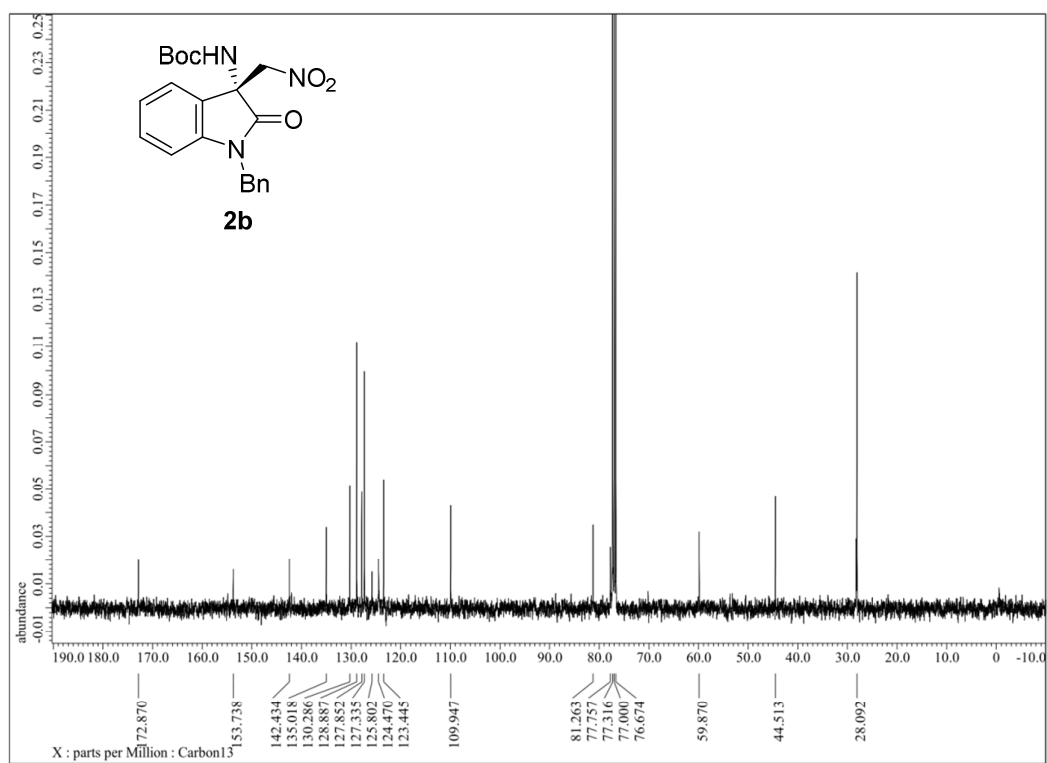

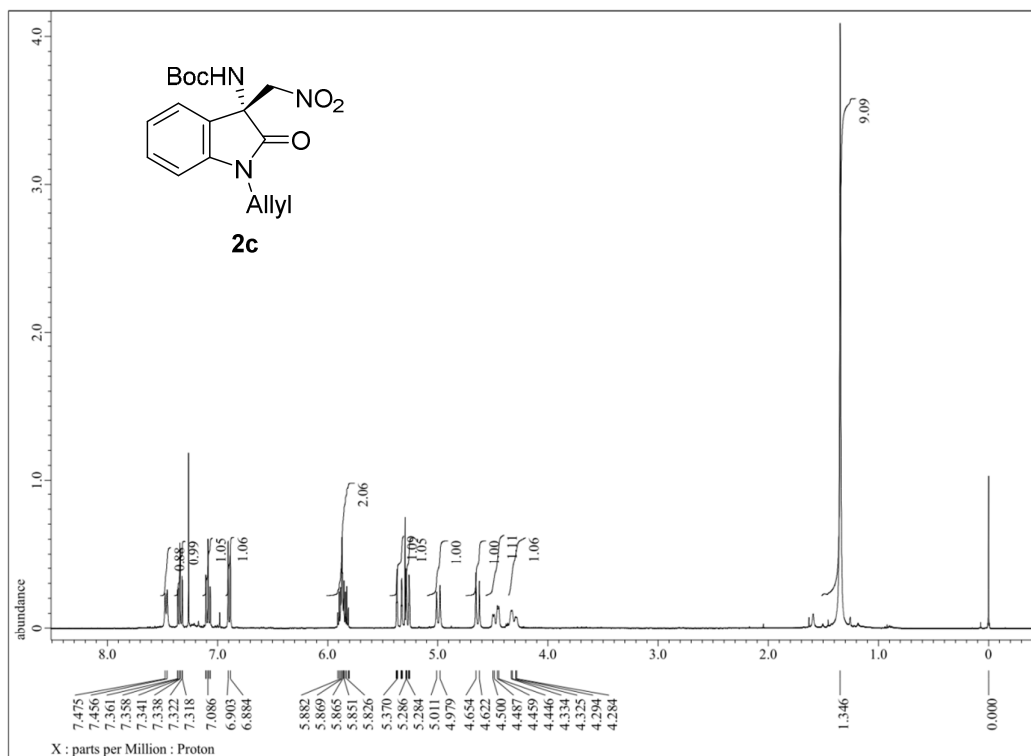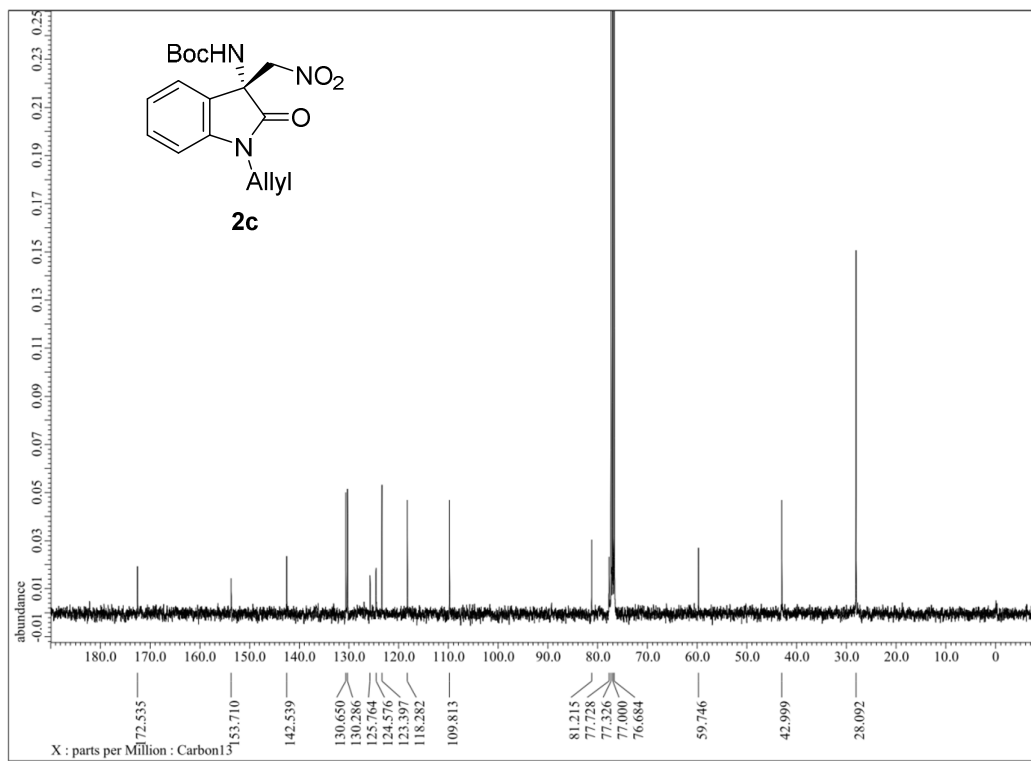

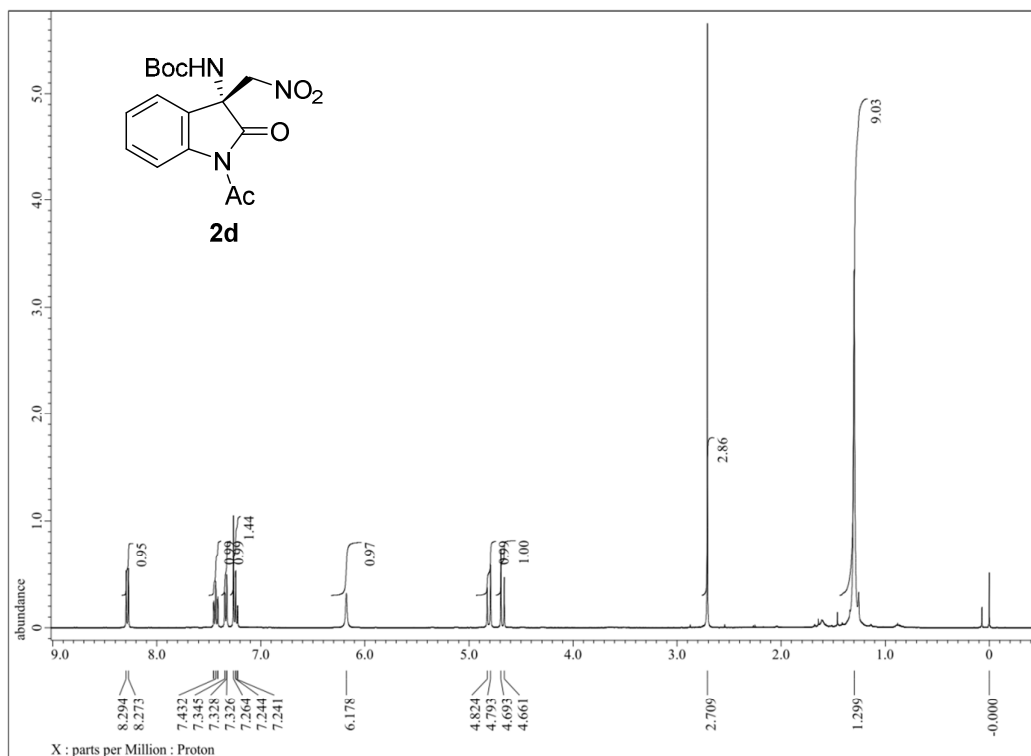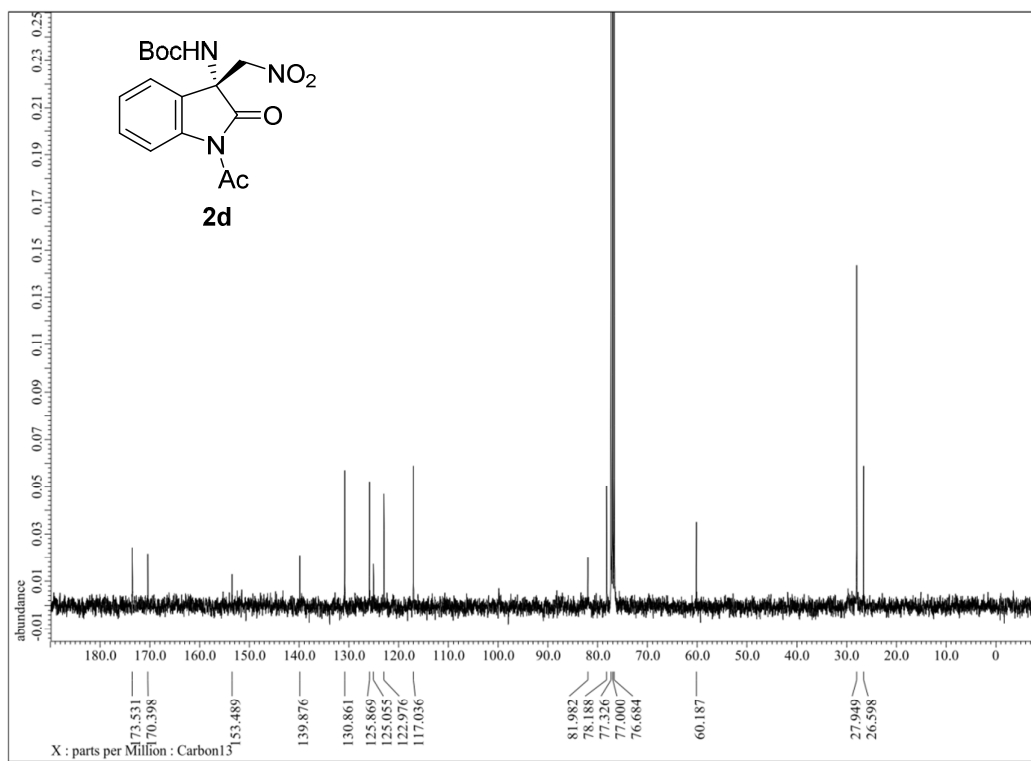

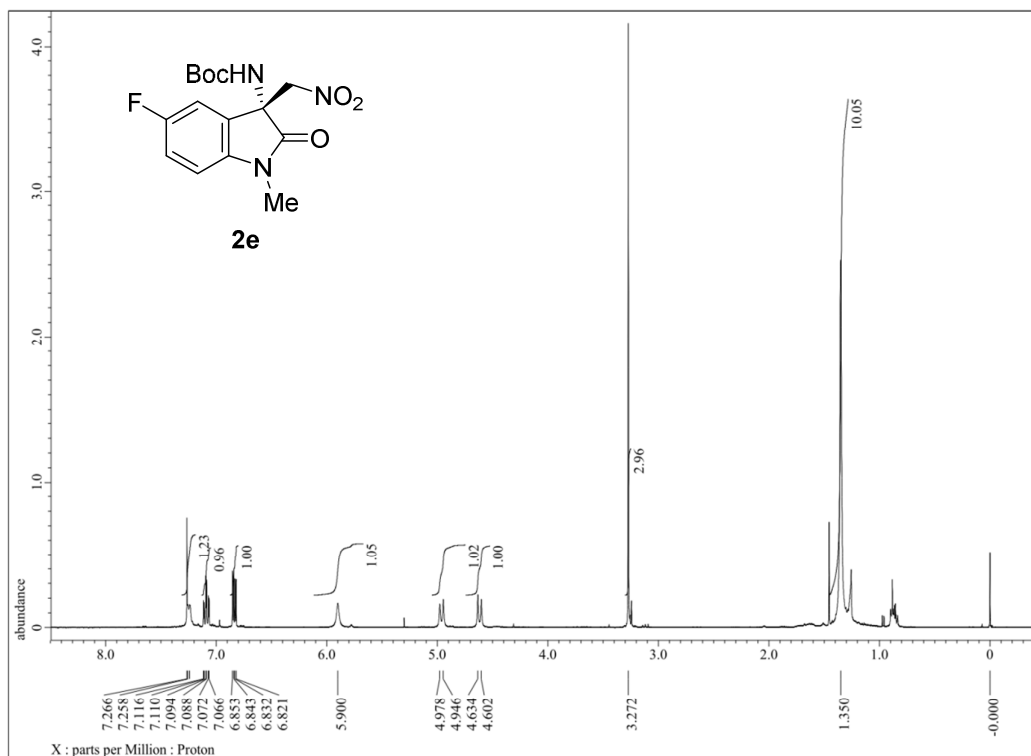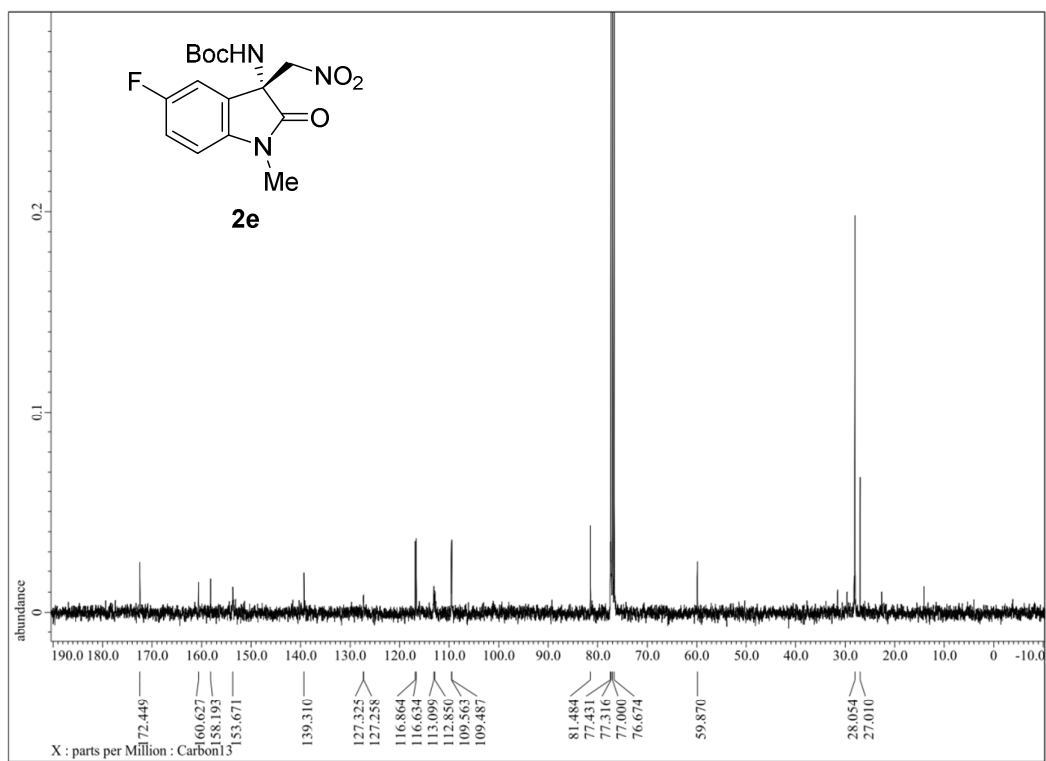

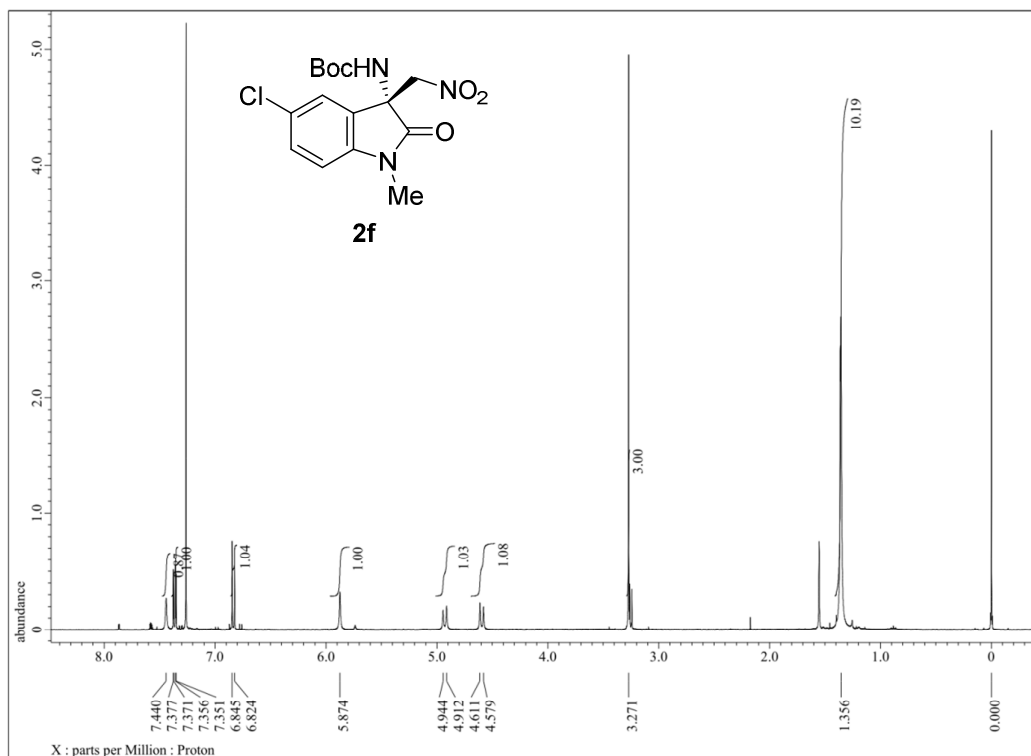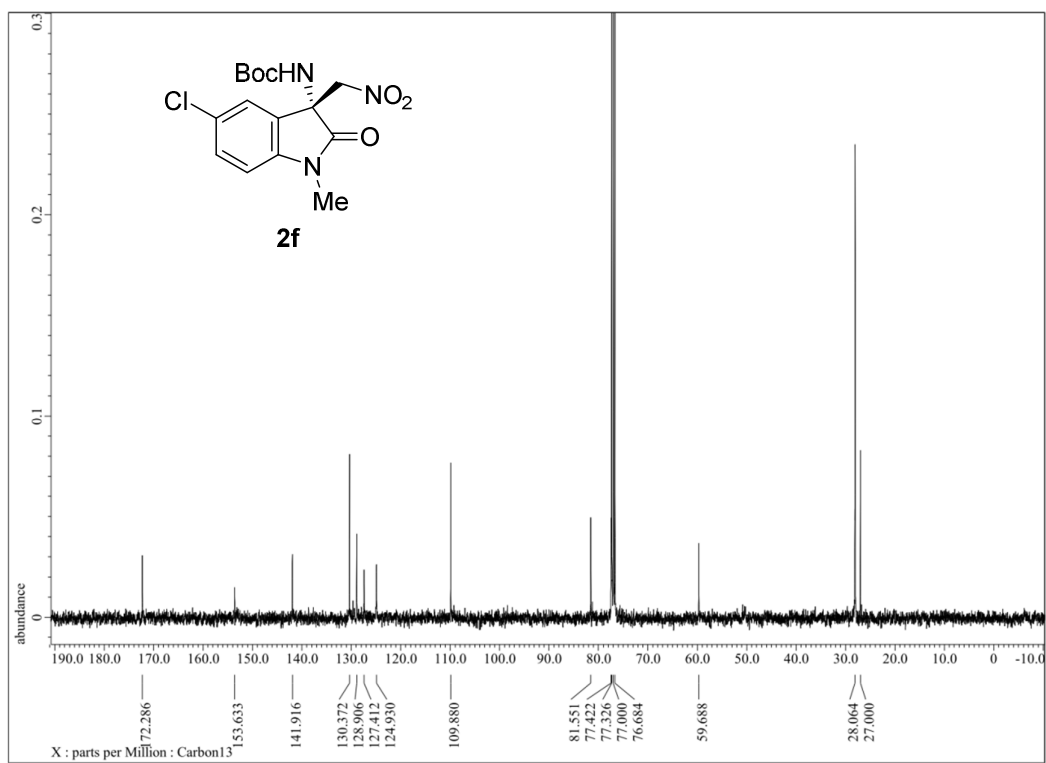

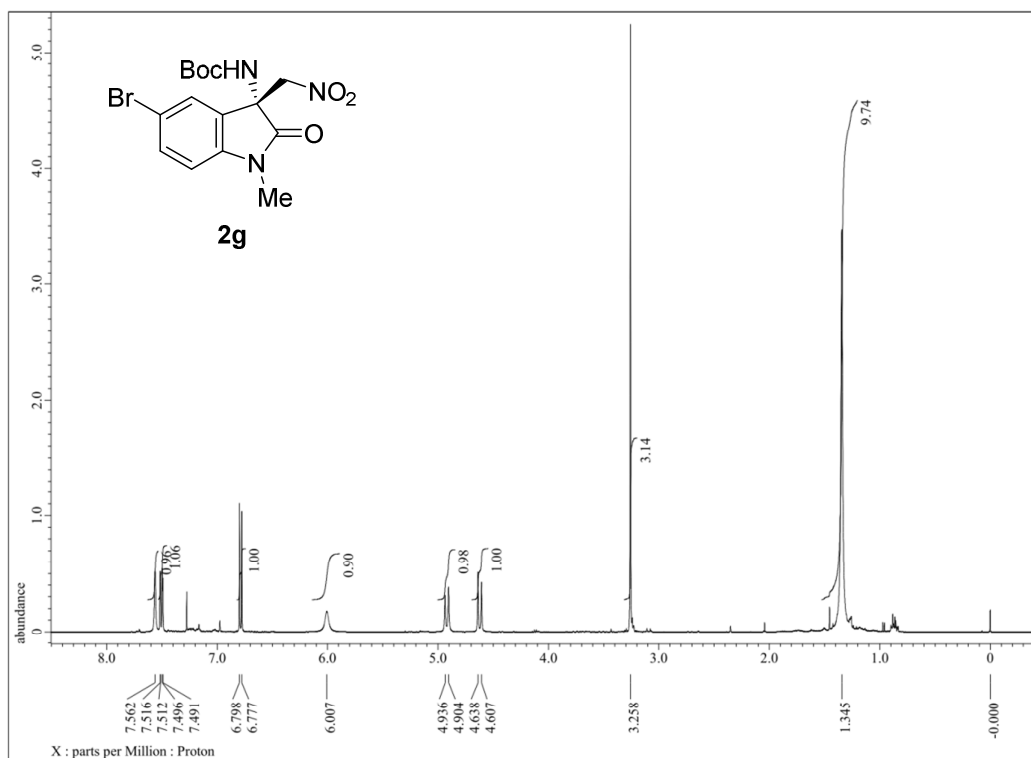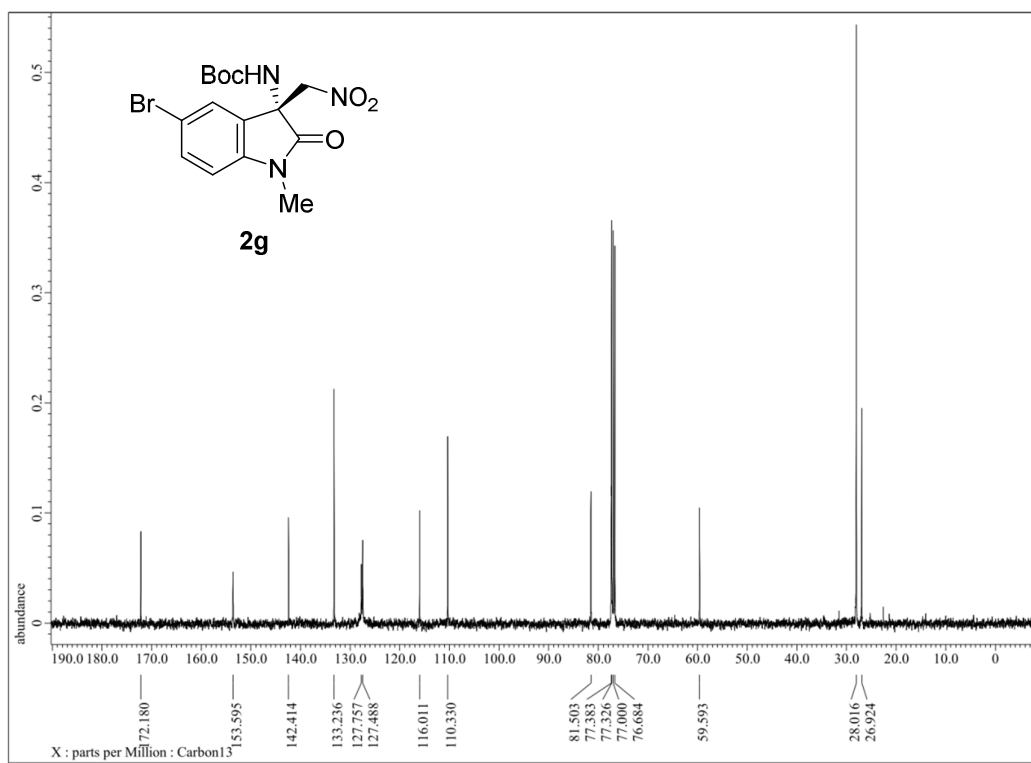

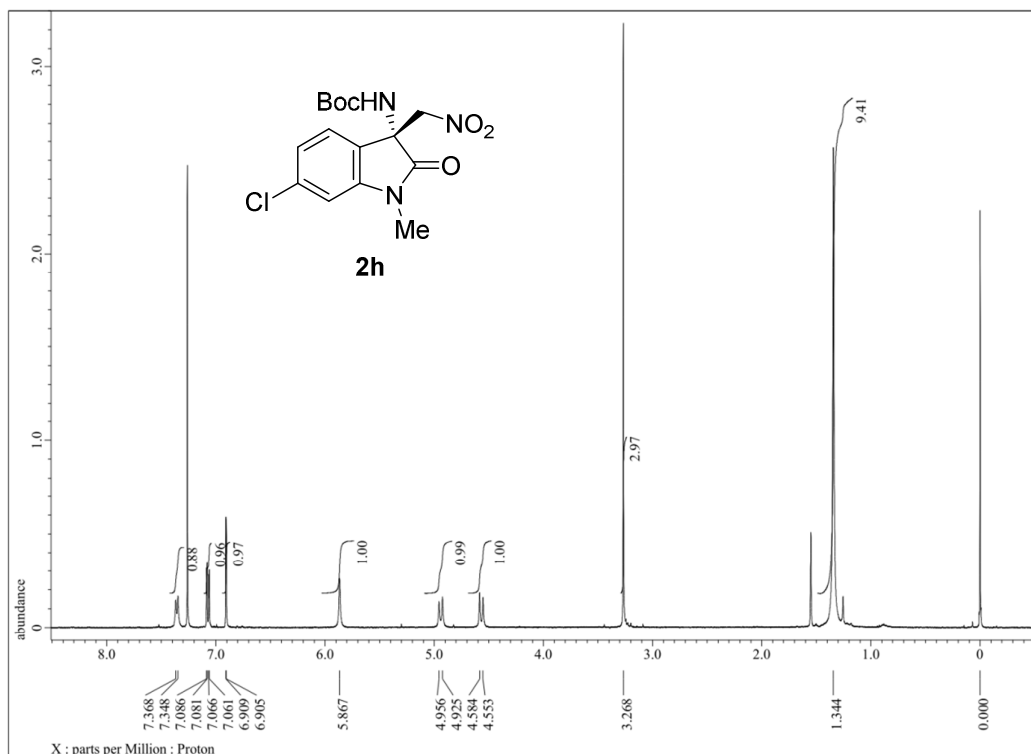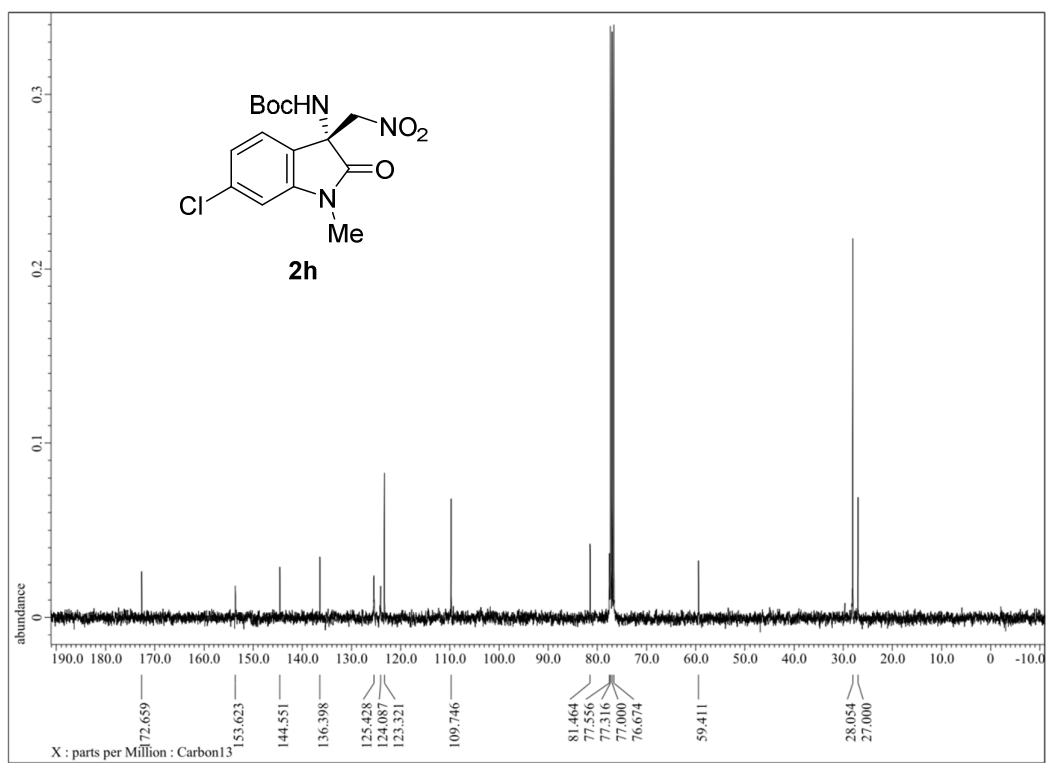

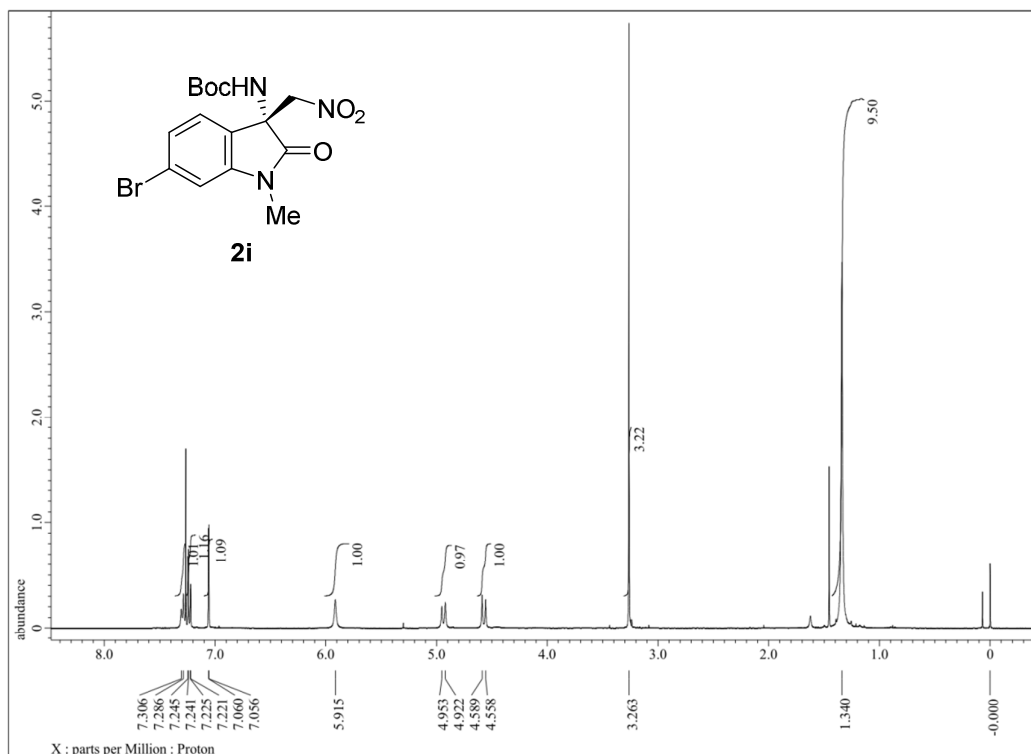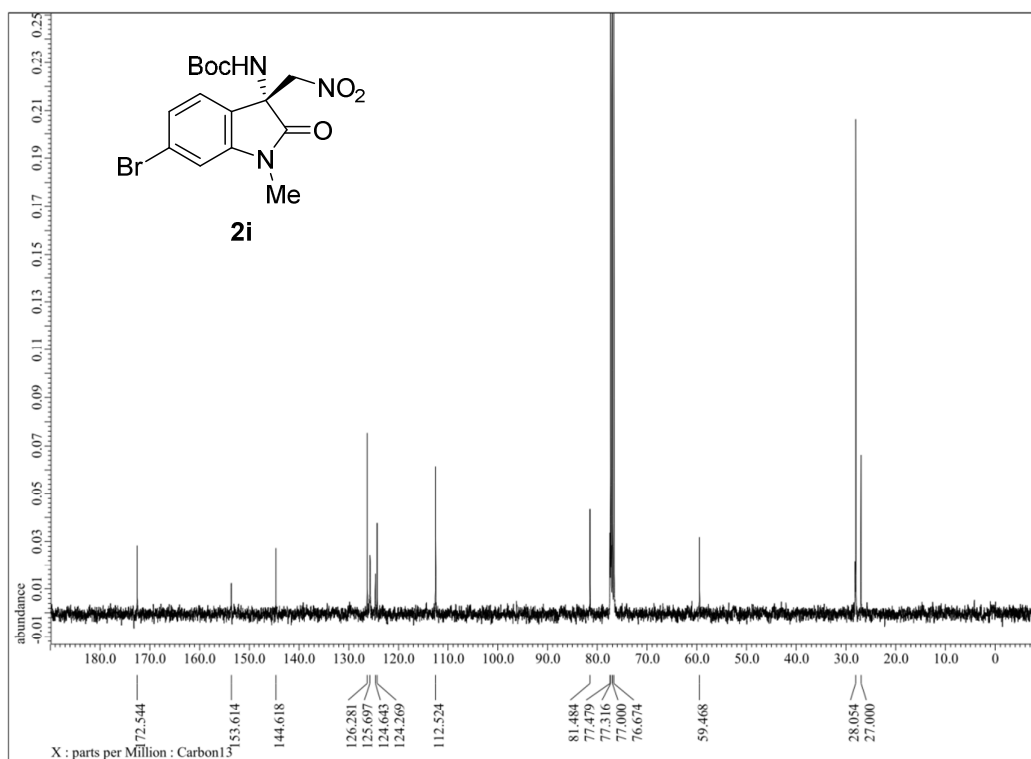



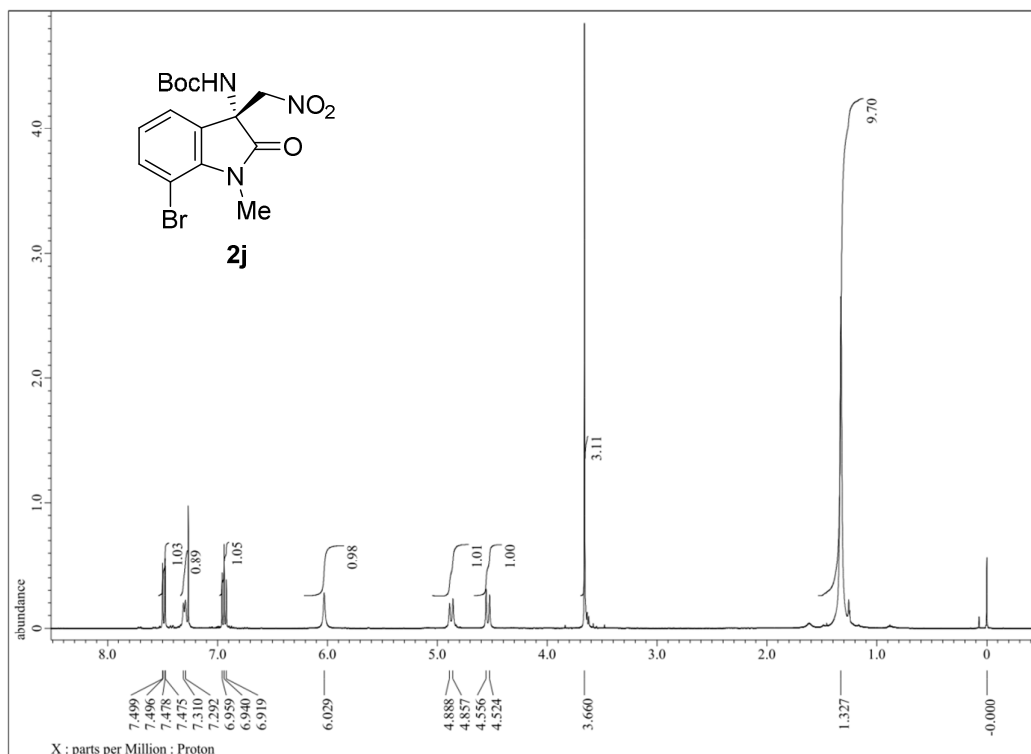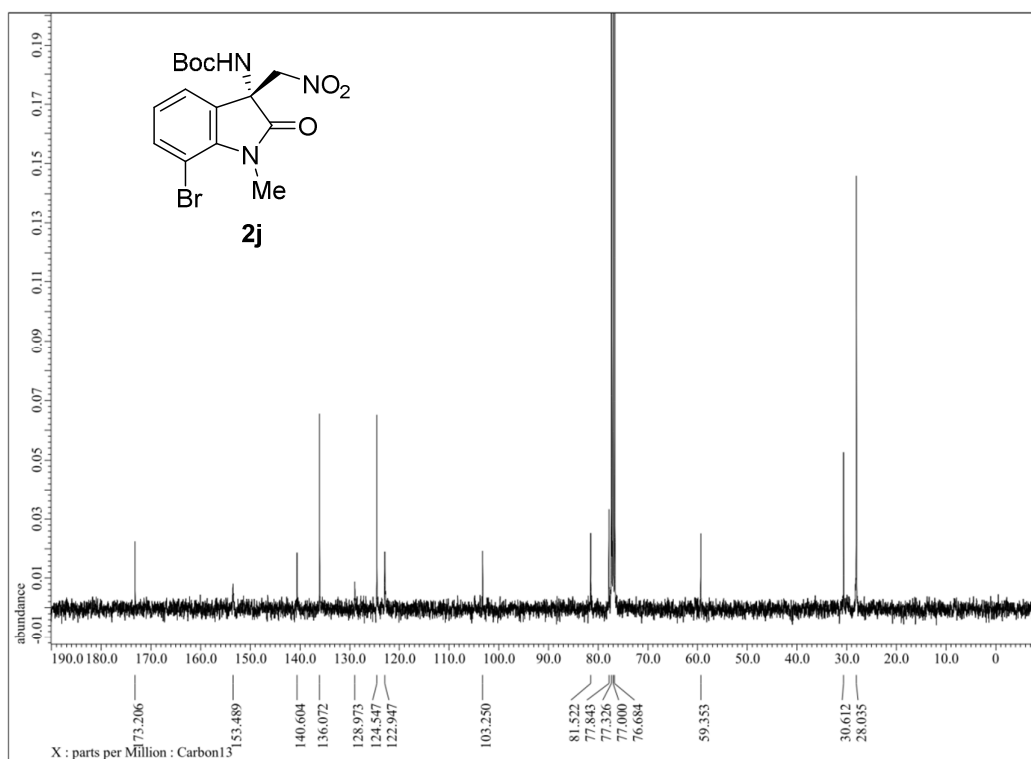

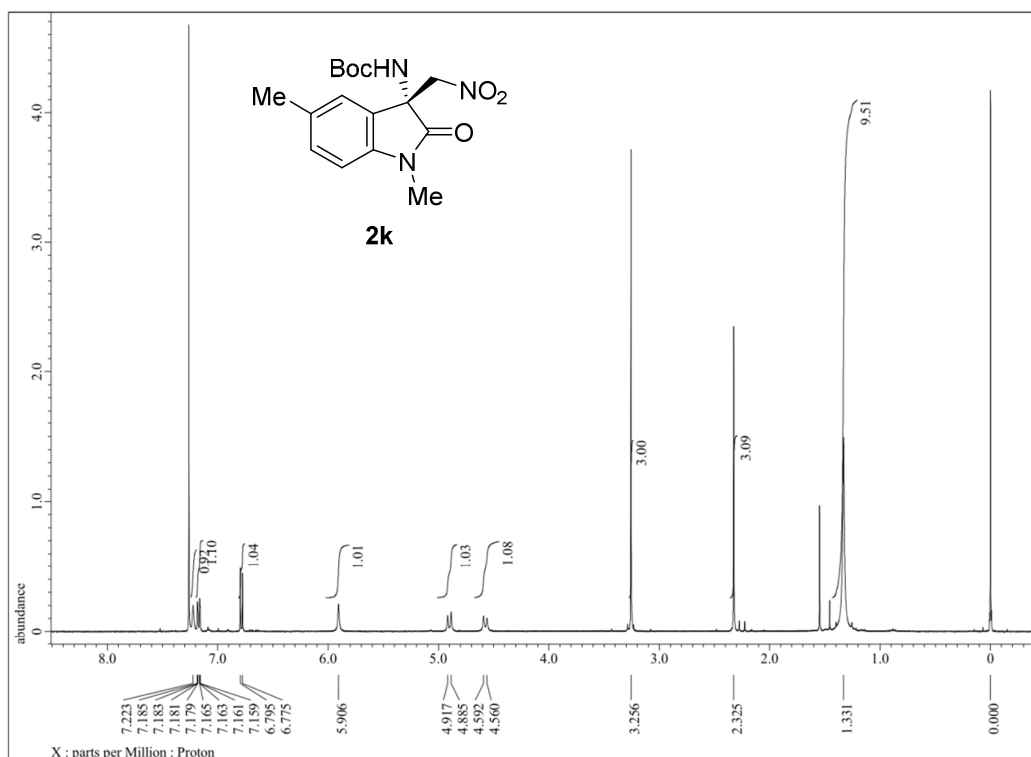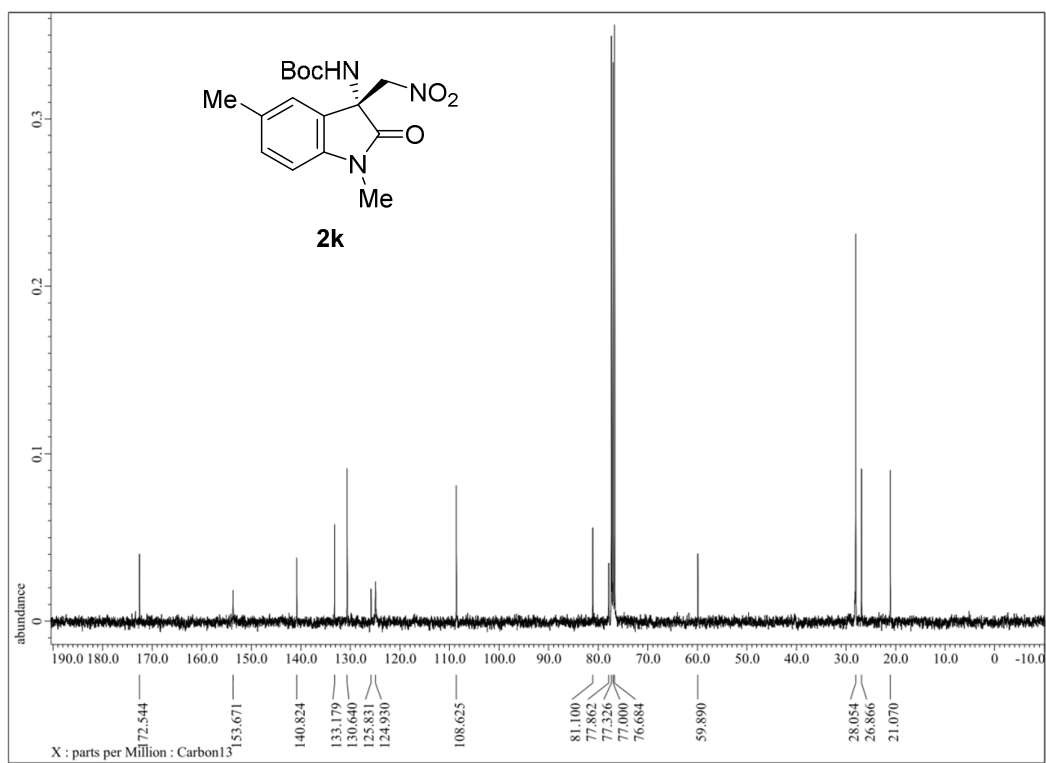

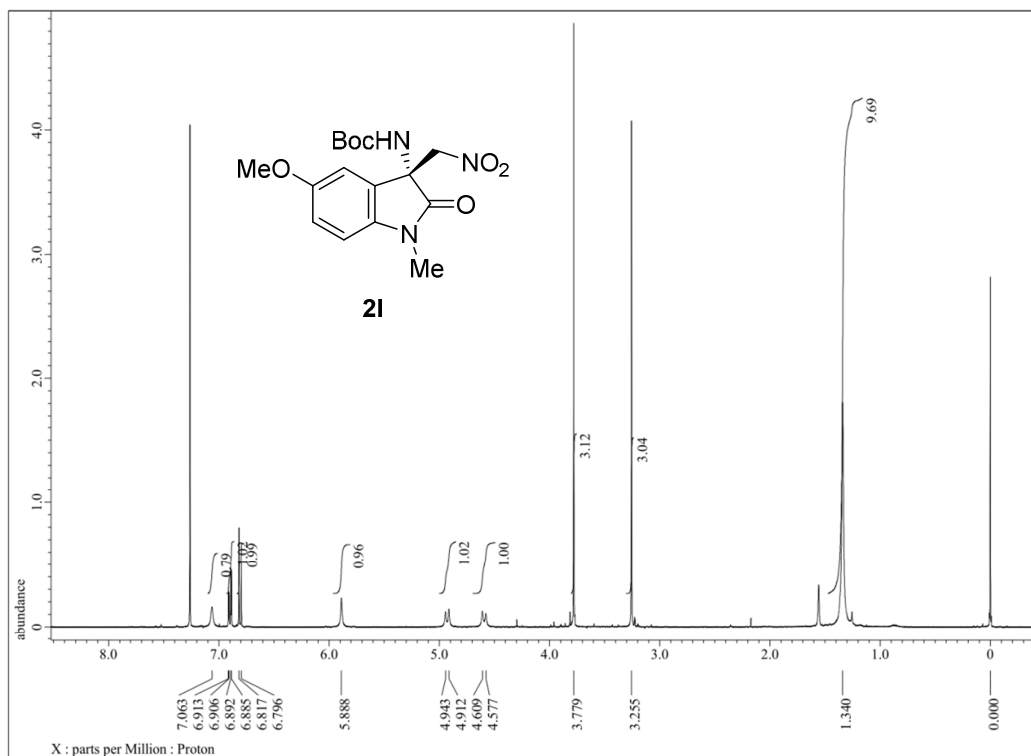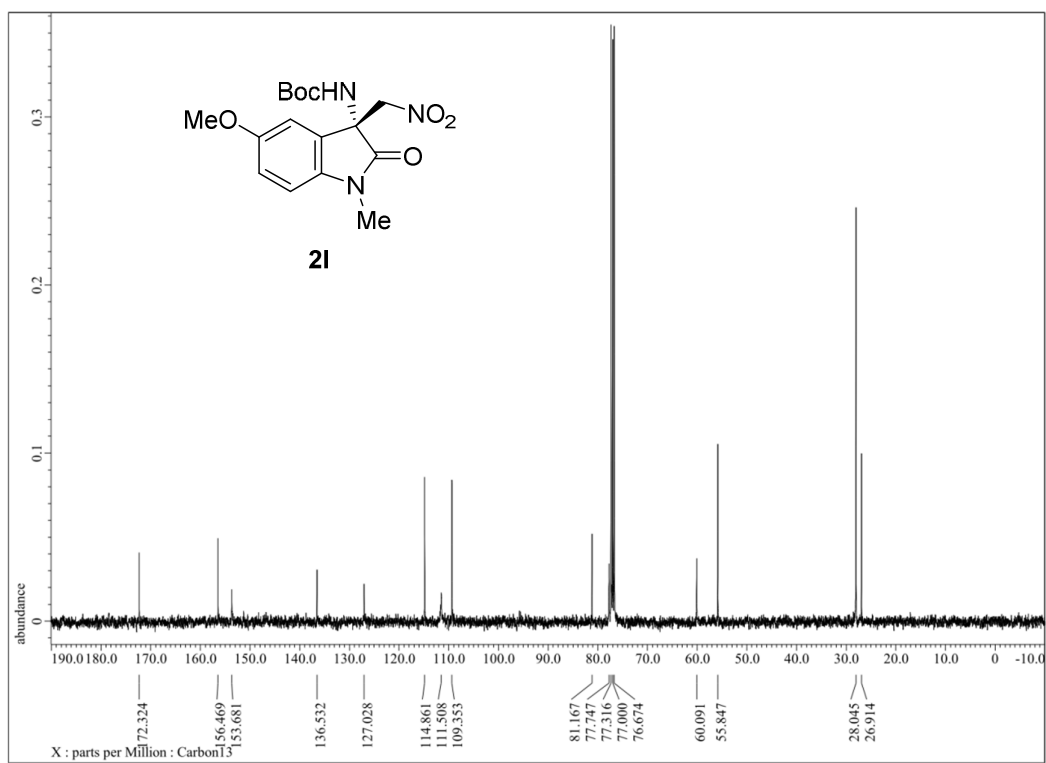

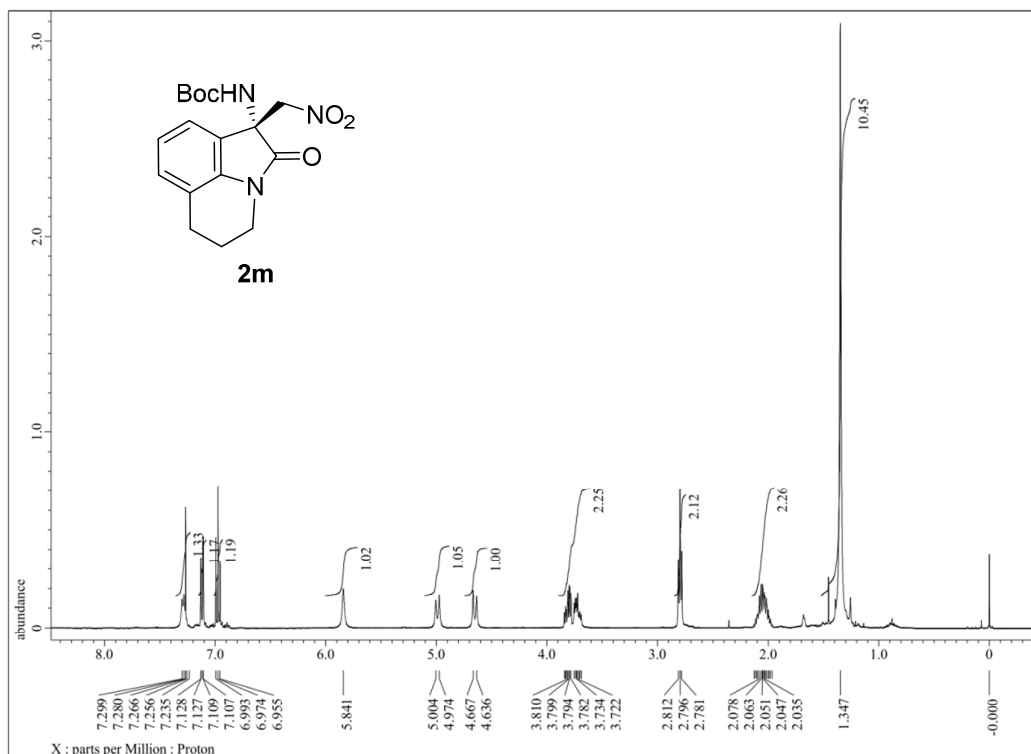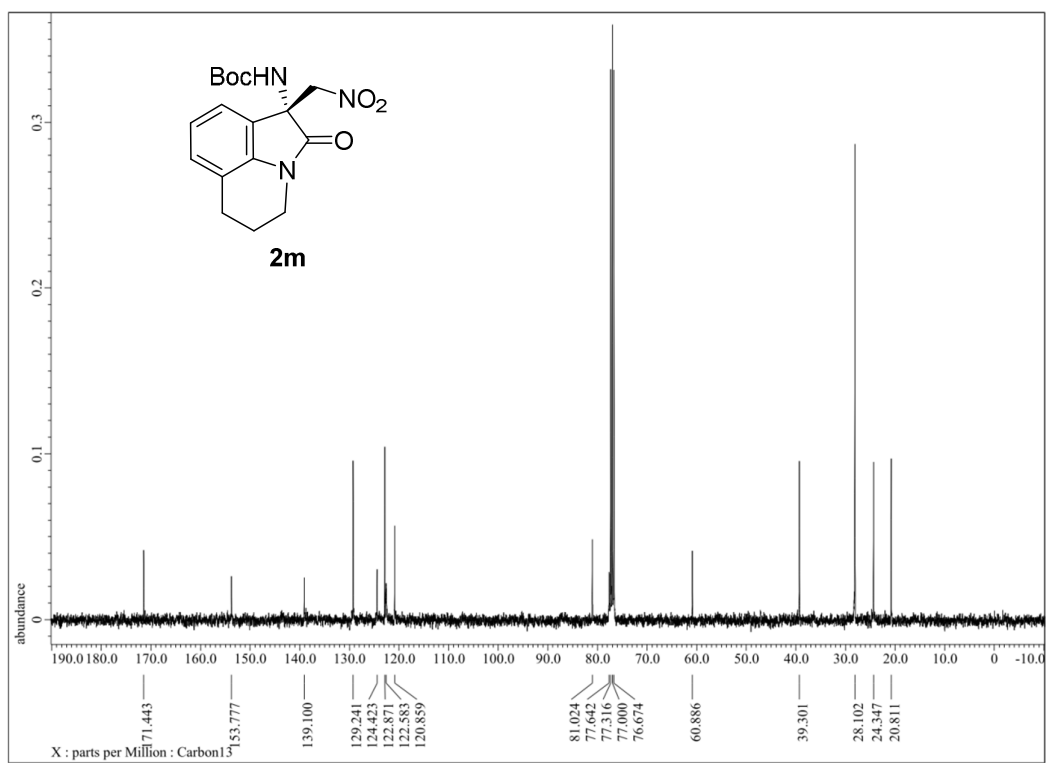

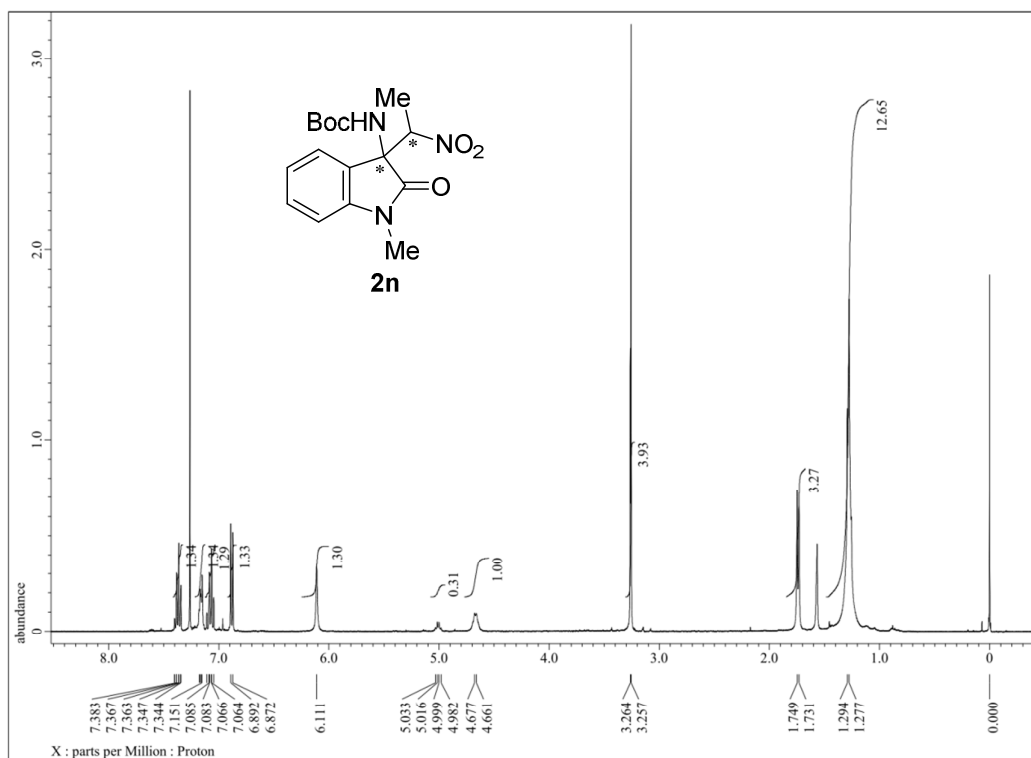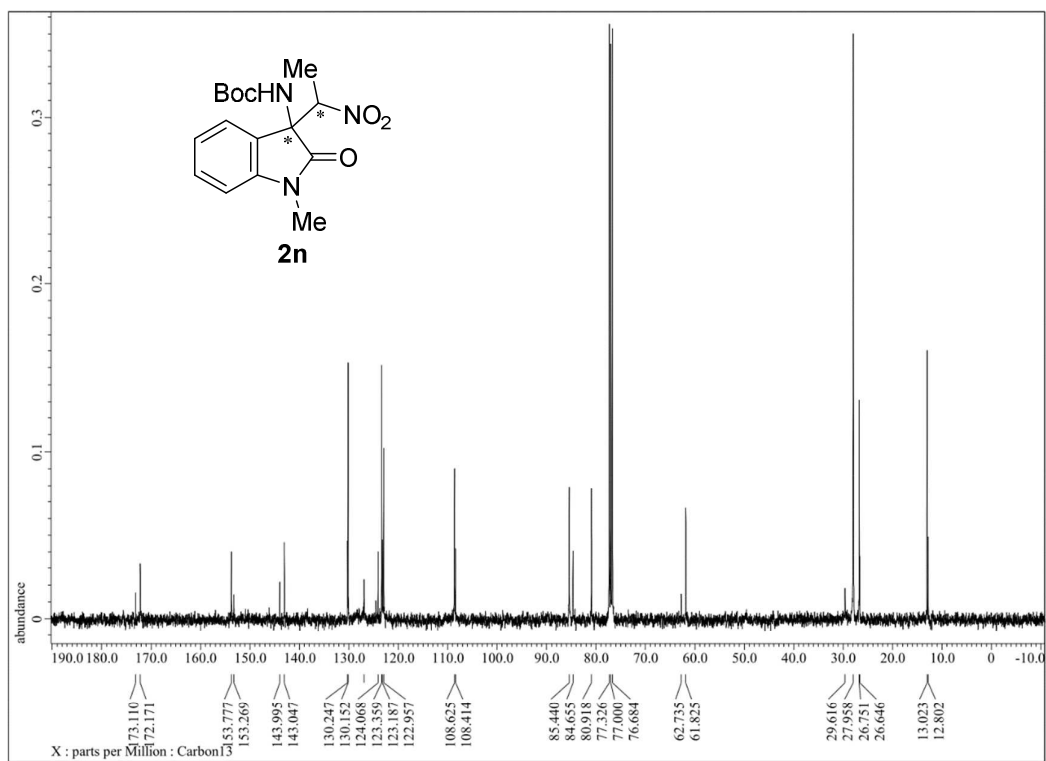

Product obtained by reduction of **2a** (Scheme 3)

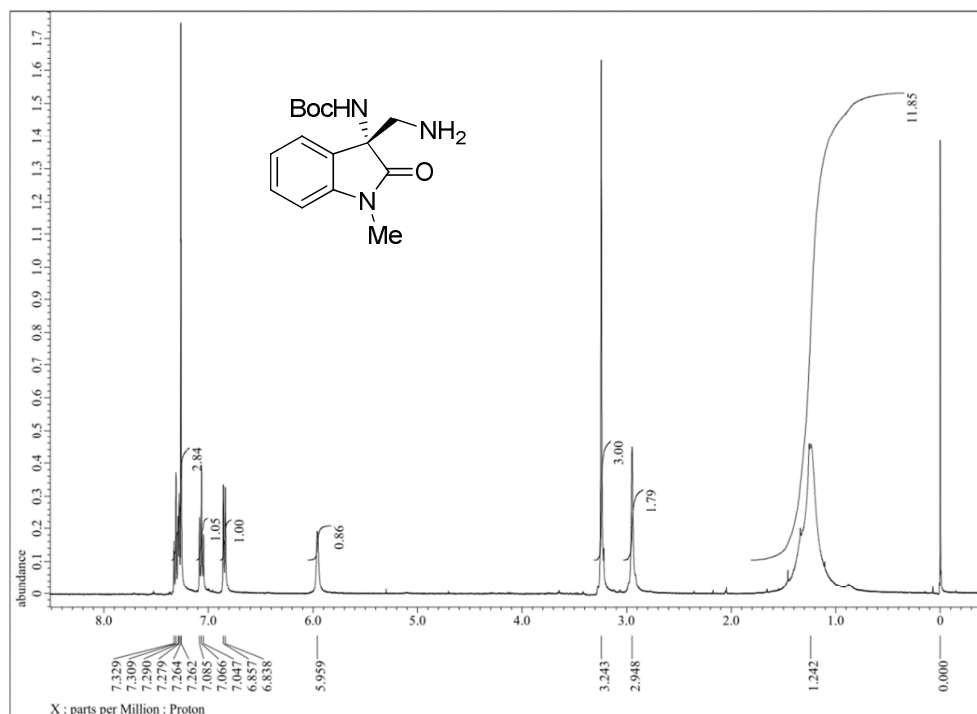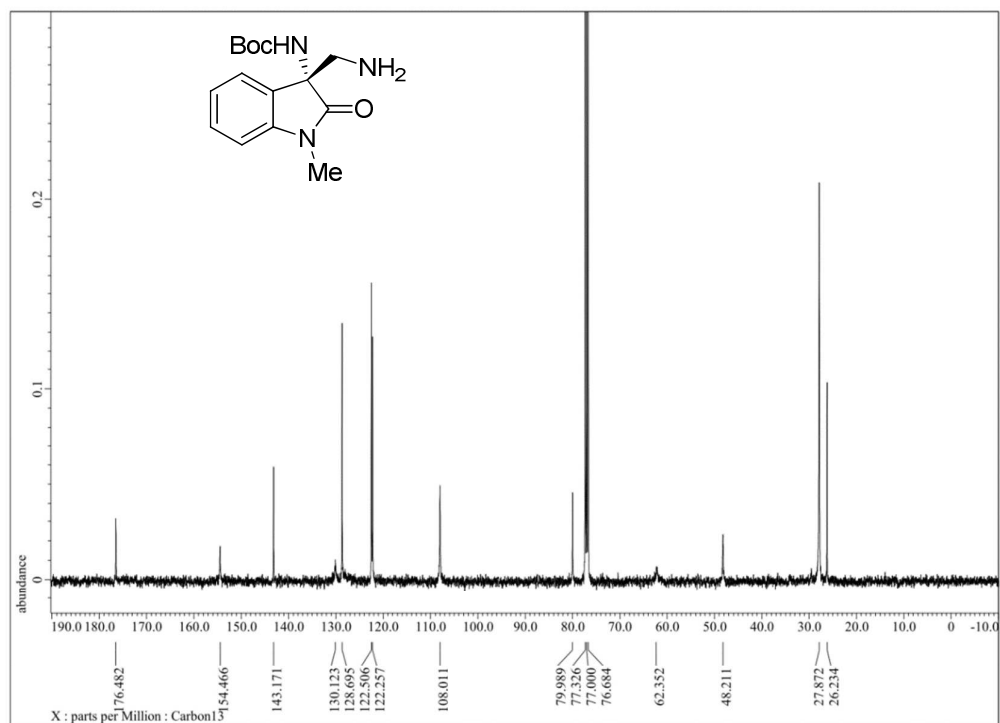

Product obtained by deprotection of Boc group from **2g** (Scheme 3)

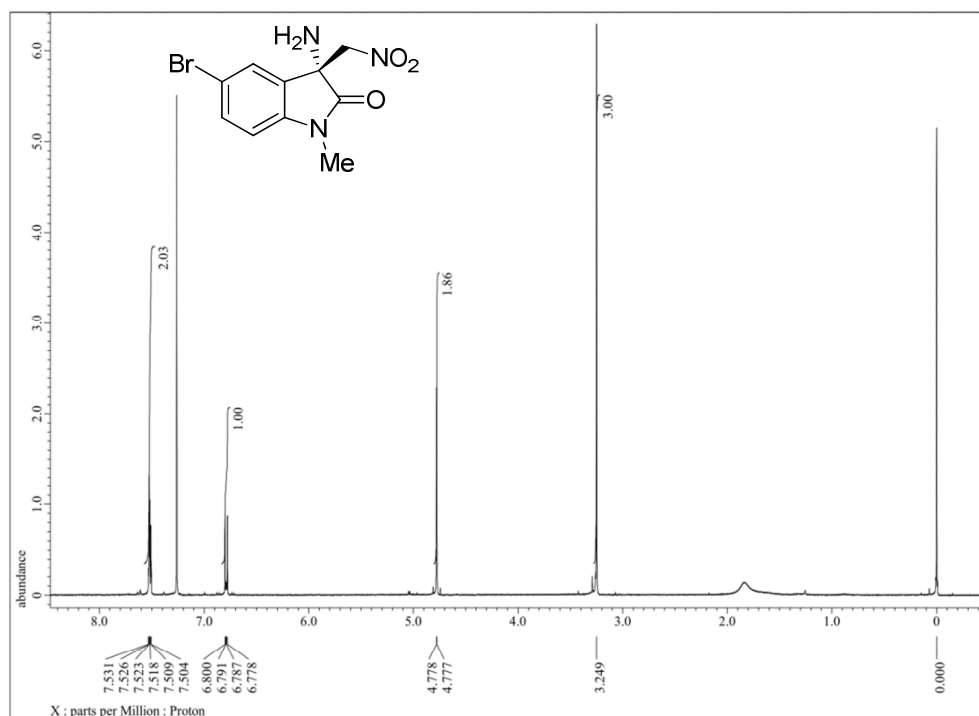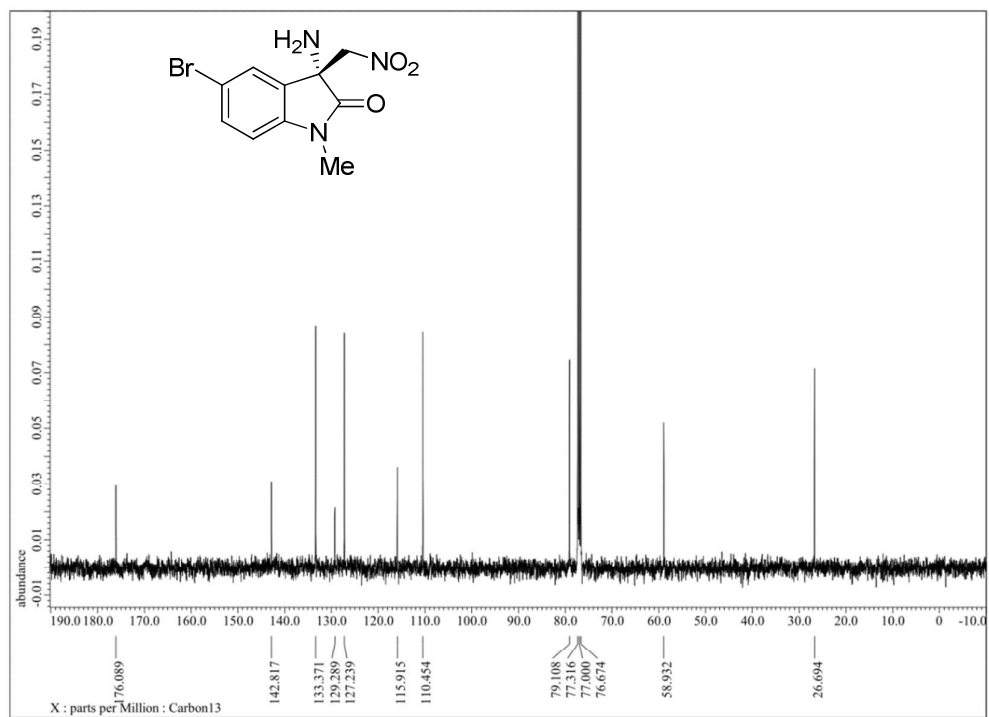

## 10. HPLC spectra

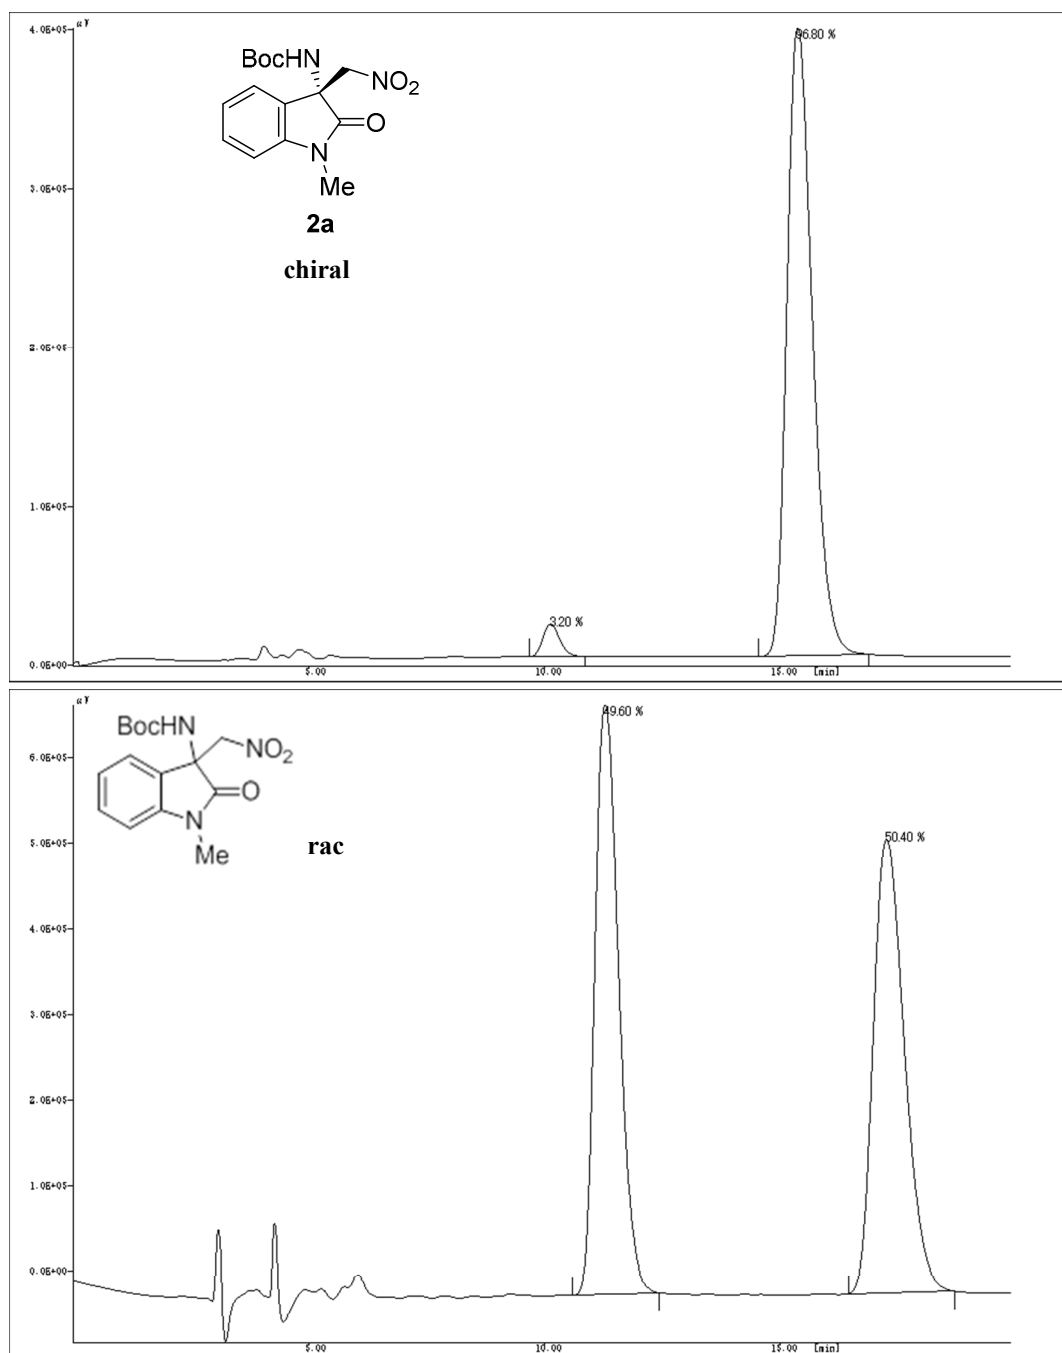



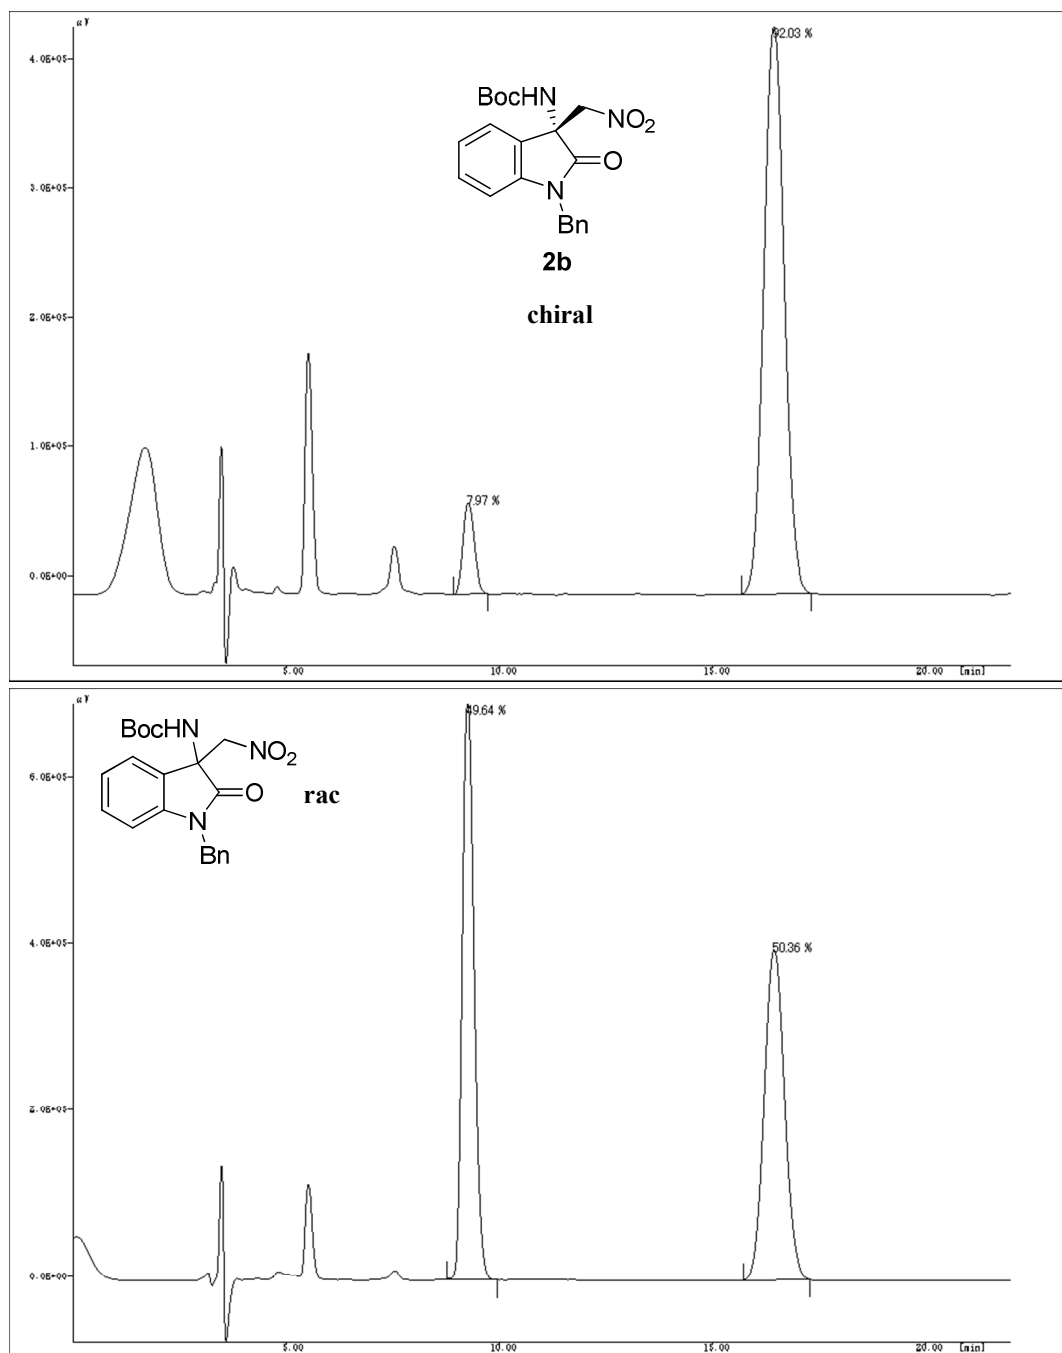

Chiralpak AD-H column (hexane:2-propanol= 70:30, 1.0 ml/min, 254 nm)

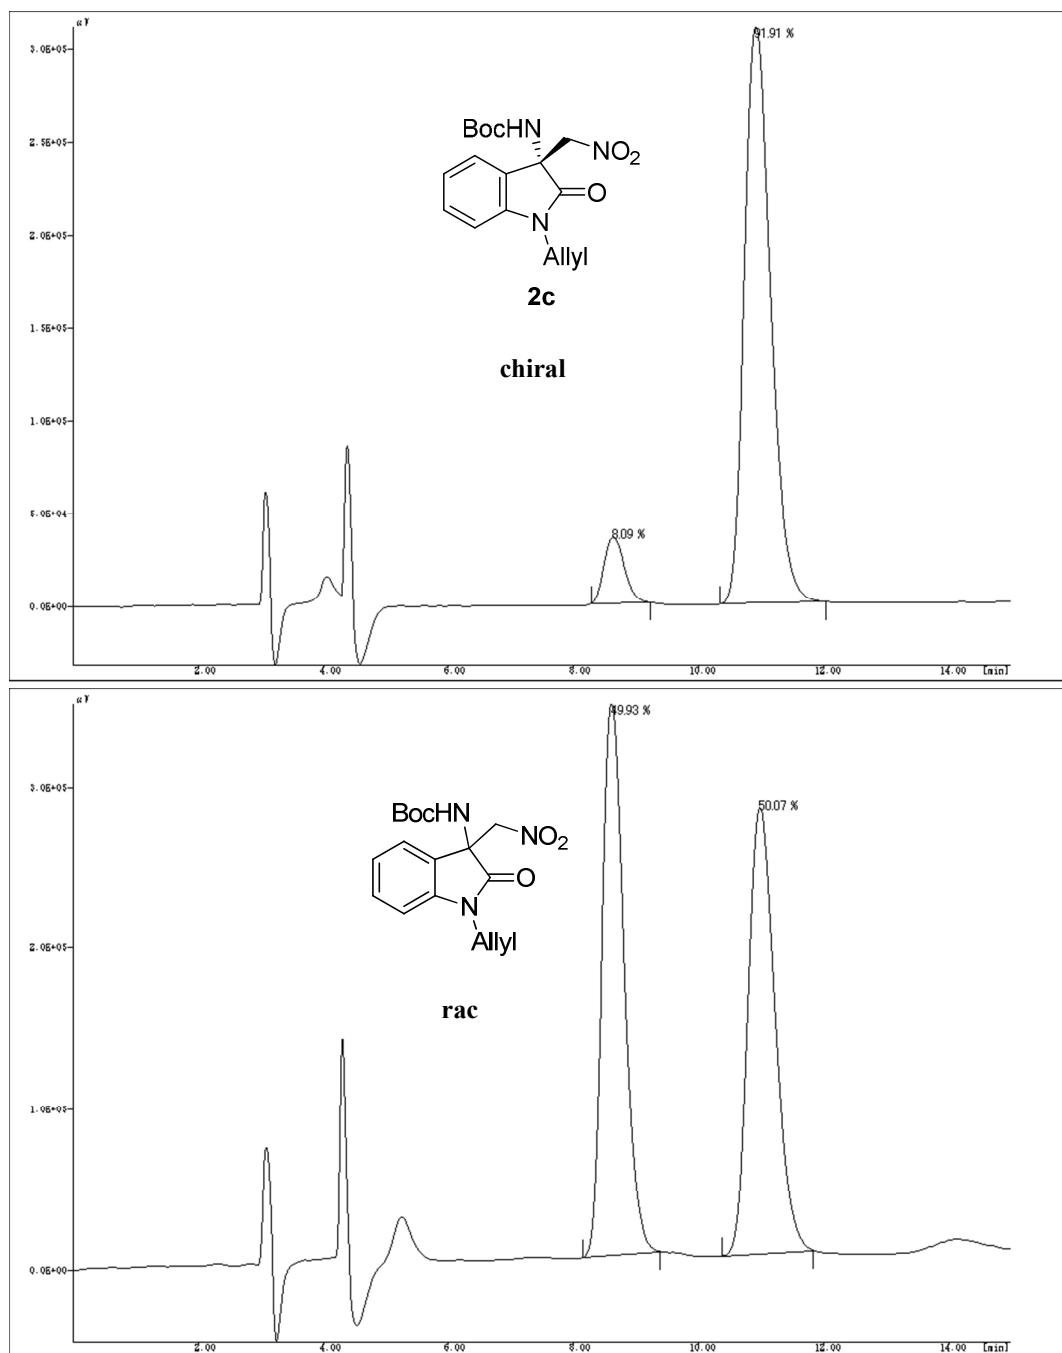

Chiralcel OD-H column (hexane:2-propanol= 90:10, 1.0 ml/min, 254 nm)

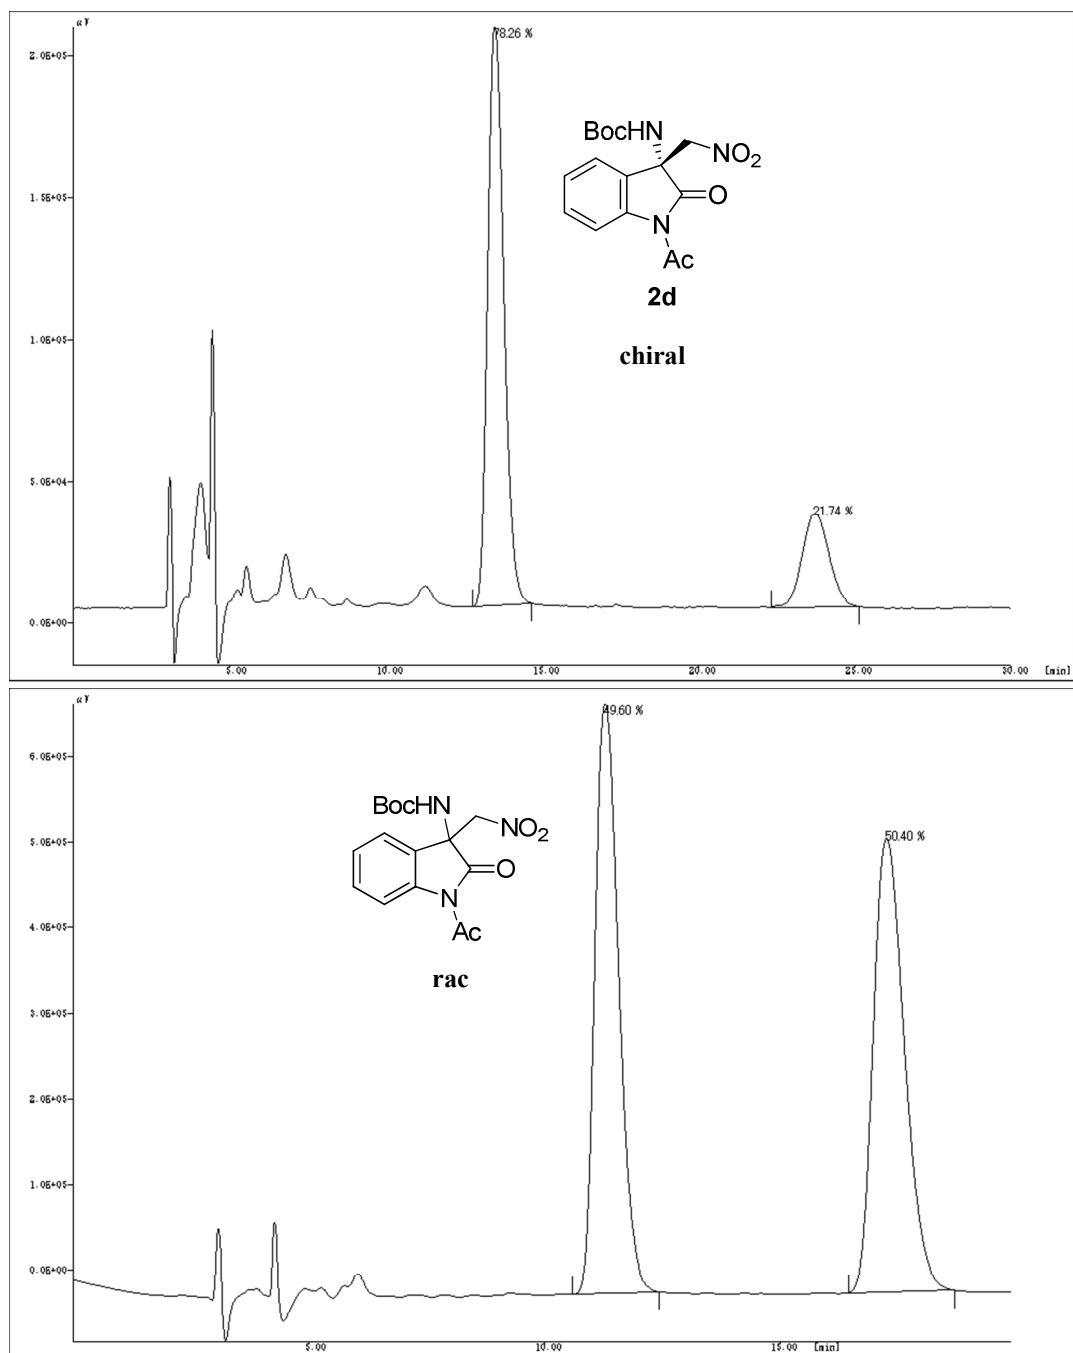

Chiralcel OD-H column (hexane:2-propanol= 90:10, 1.0 ml/min, 254 nm)

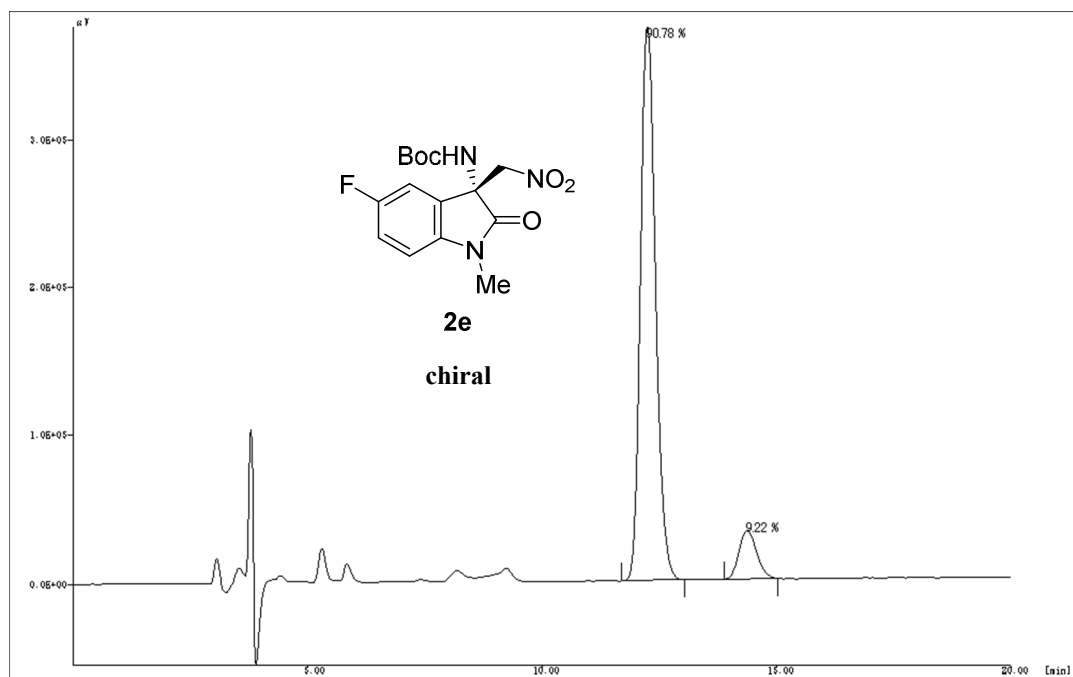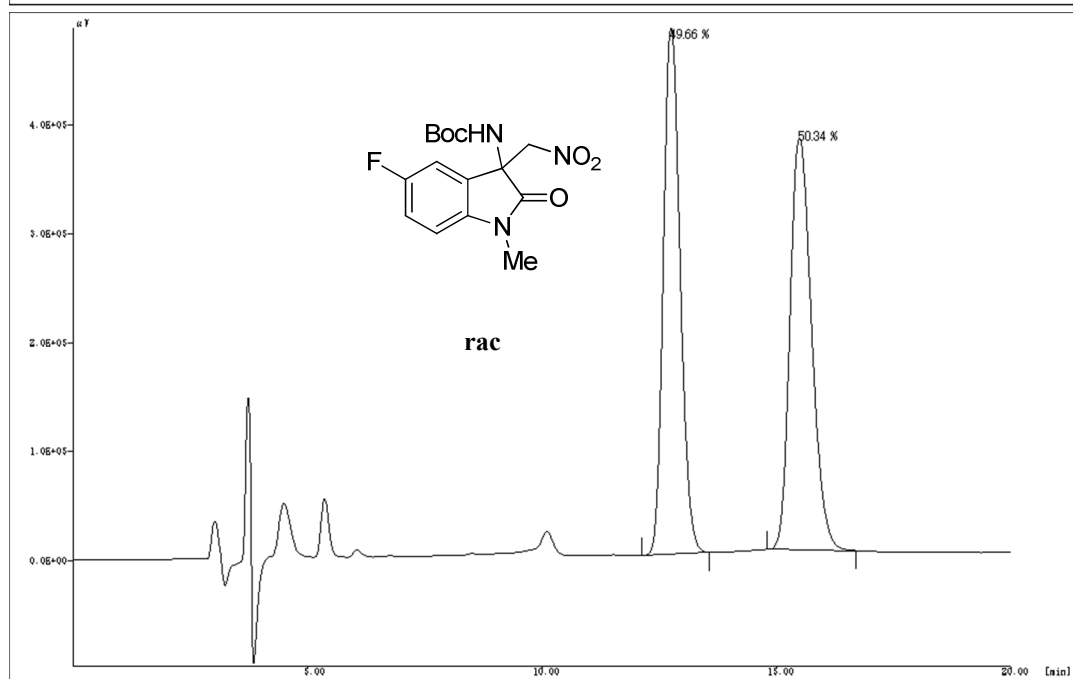

Chiralpak AD-H column (hexane:2-propanol= 80:20, 1.0 ml/min, 254 nm)

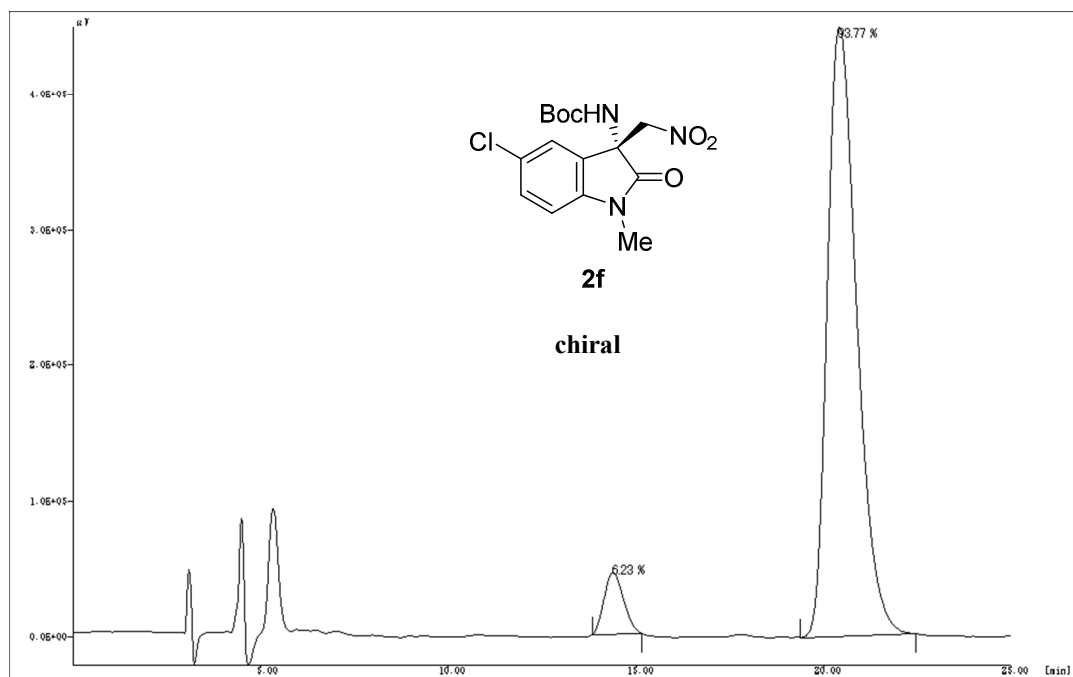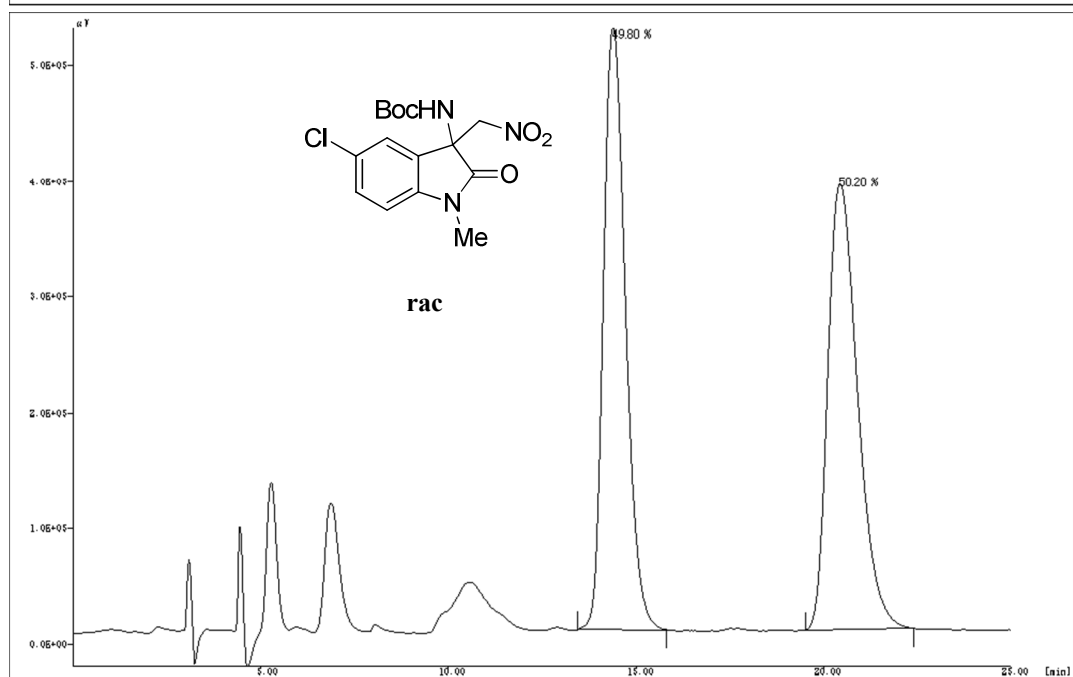

Chiralcel OD-H column (hexane:2-propanol= 90:10, 1.0 ml/min, 254 nm)

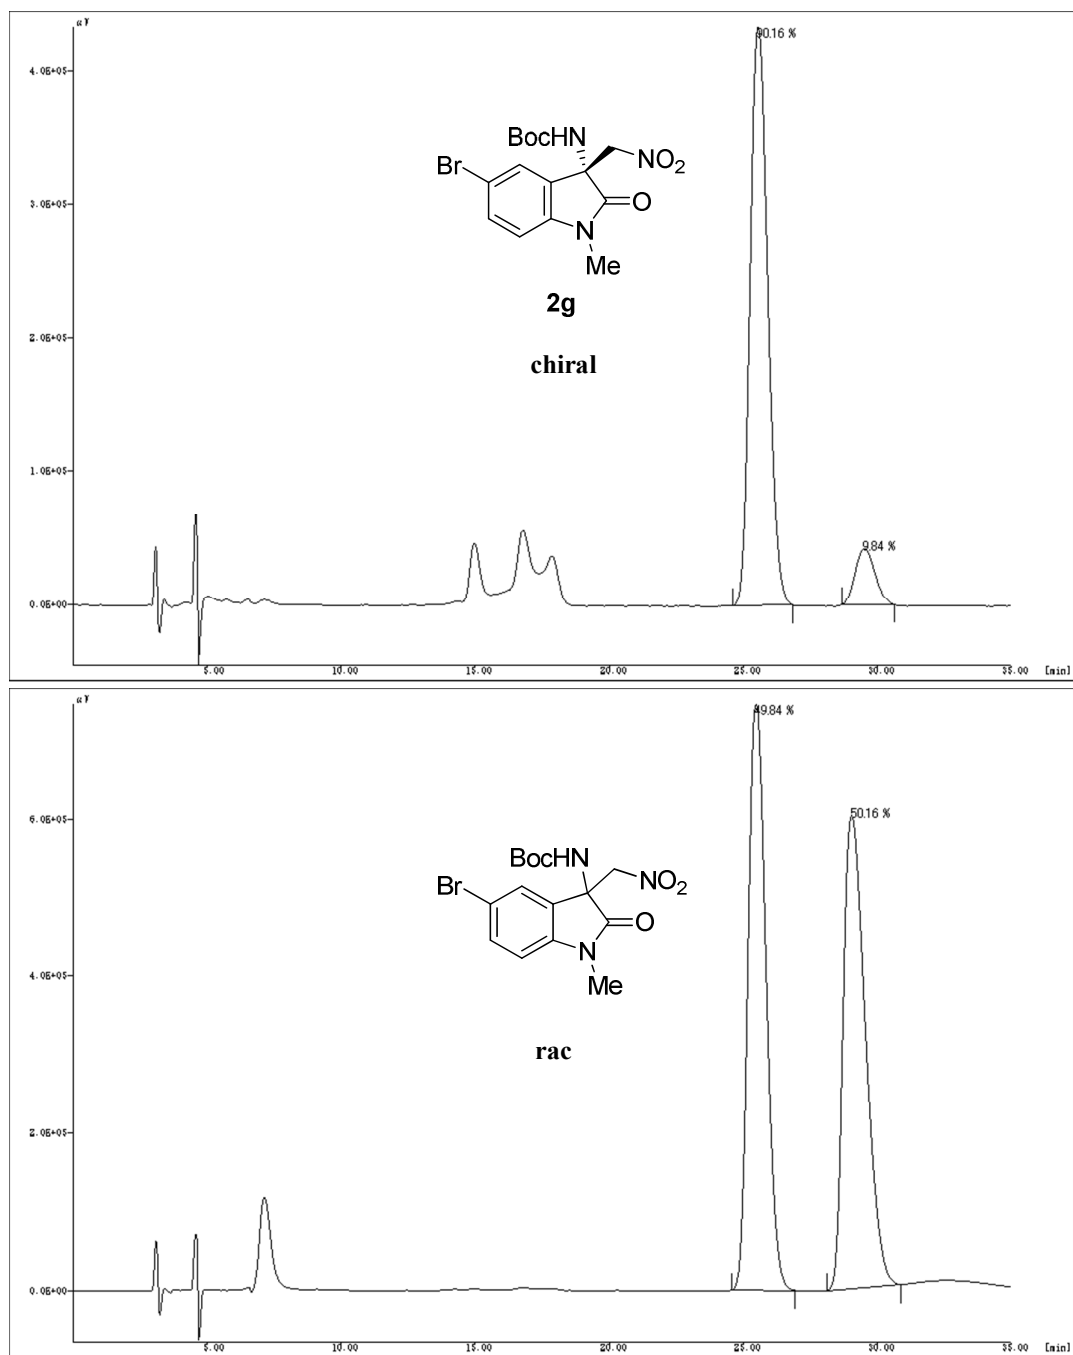

Chiralpak AD-H column (hexane:2-propanol= 90:10, 1.0 ml/min, 254 nm)

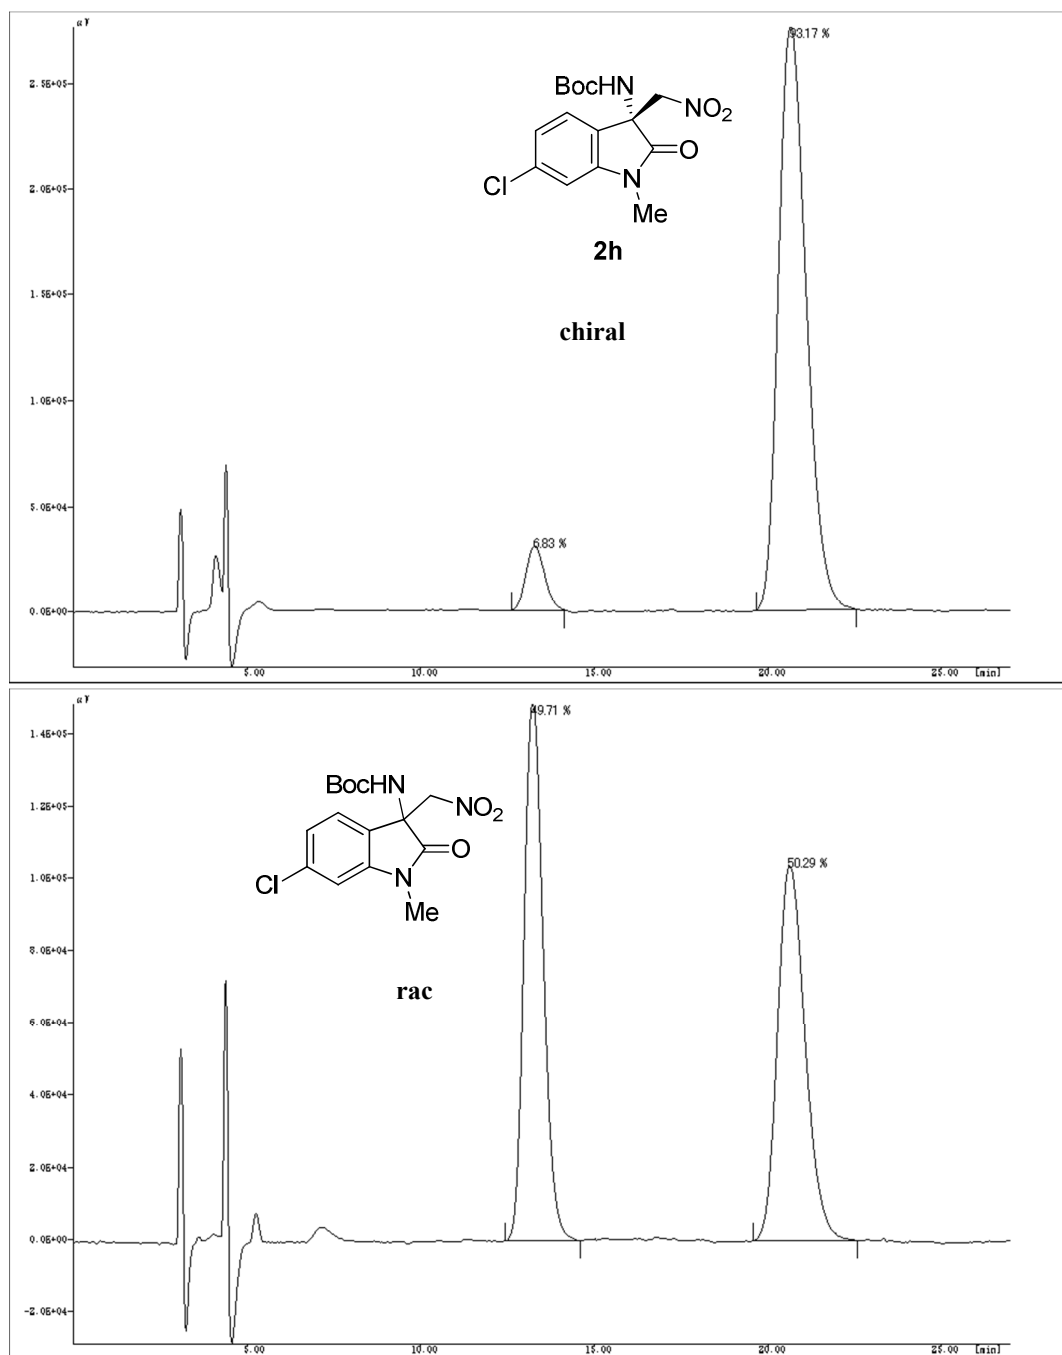

Chiralcel OD-H column (hexane:2-propanol= 90:10, 1.0 ml/min, 254 nm)

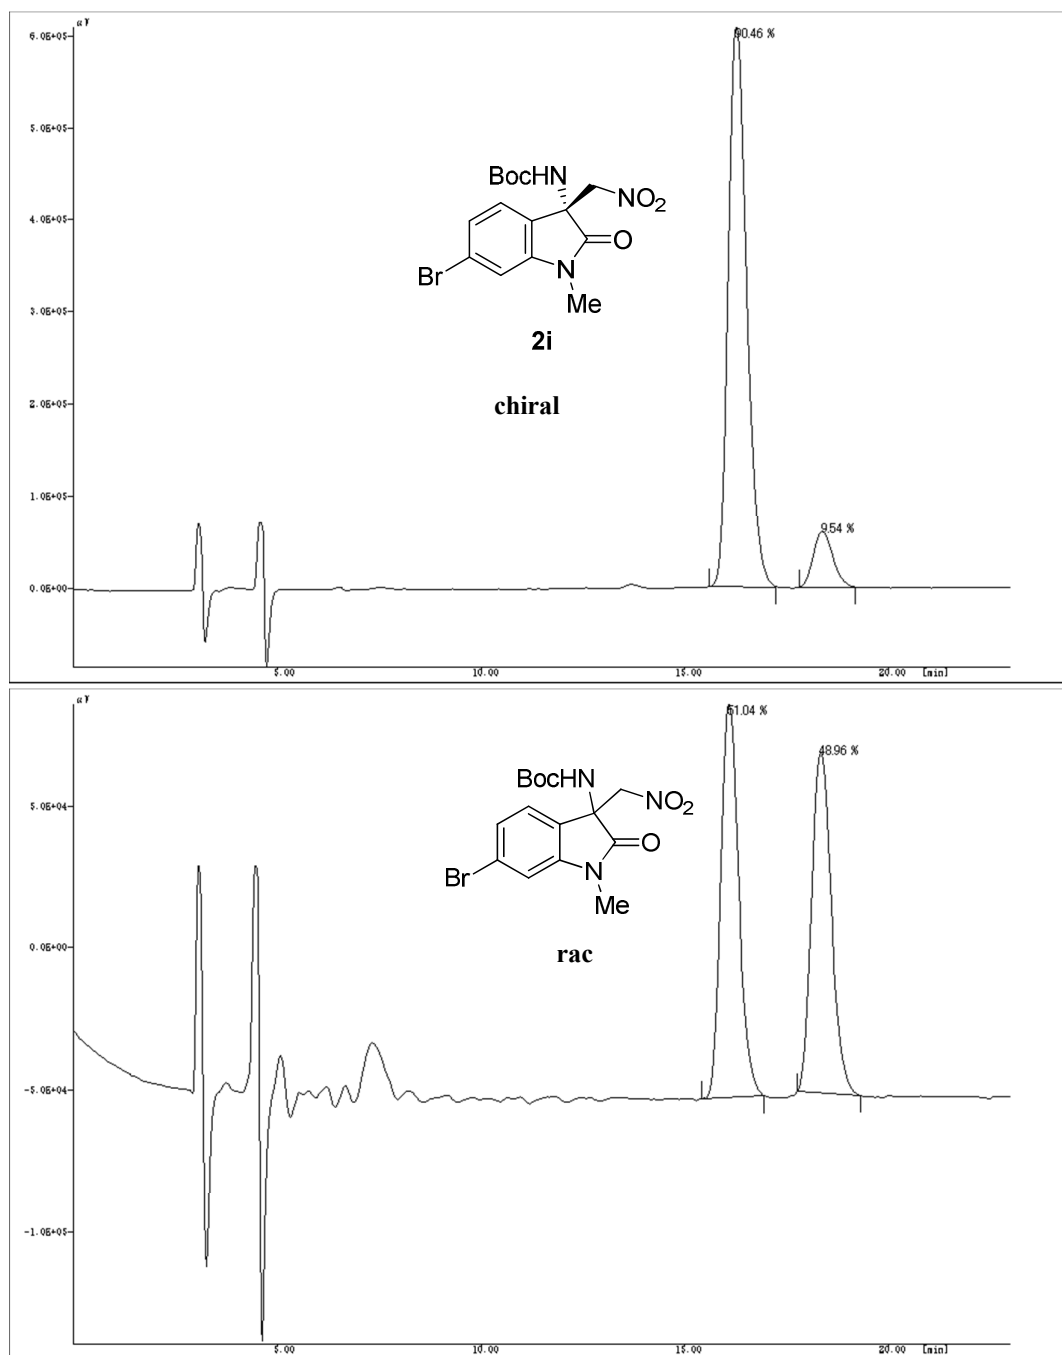

Chiralpak AD-H column (hexane:2-propanol= 90:10, 1.0 ml/min, 254 nm)



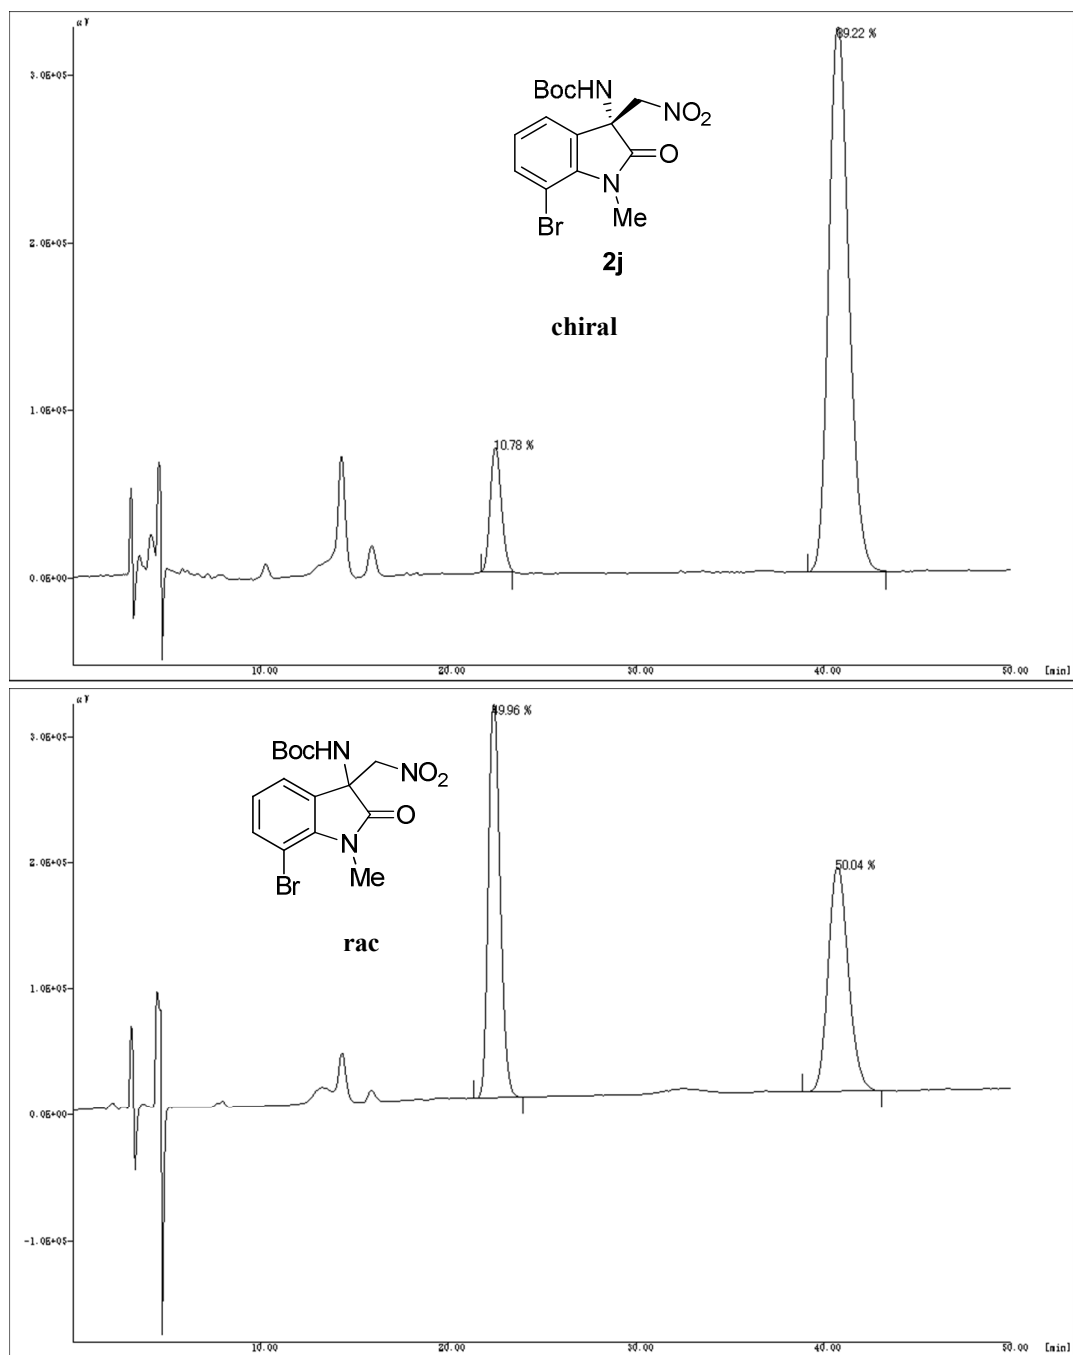

Chiralpak AD-H column (hexane:2-propanol= 90:10, 1.0 ml/min, 254 nm)

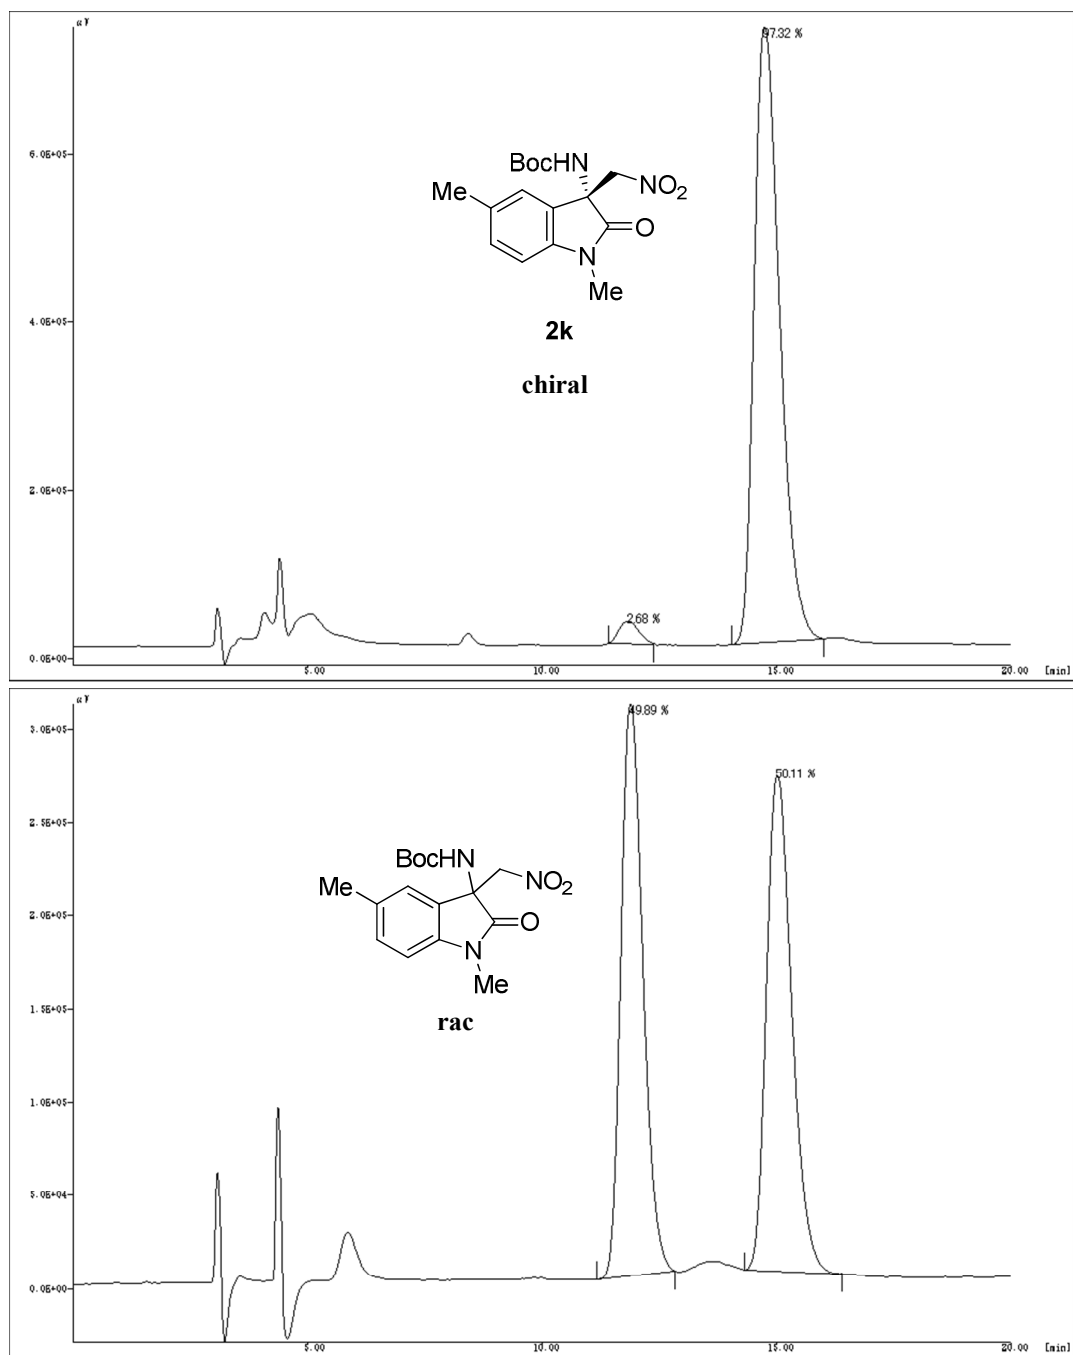

Chiralcel OD-H column (hexane:2-propanol= 90:10, 1.0 ml/min, 254 nm)

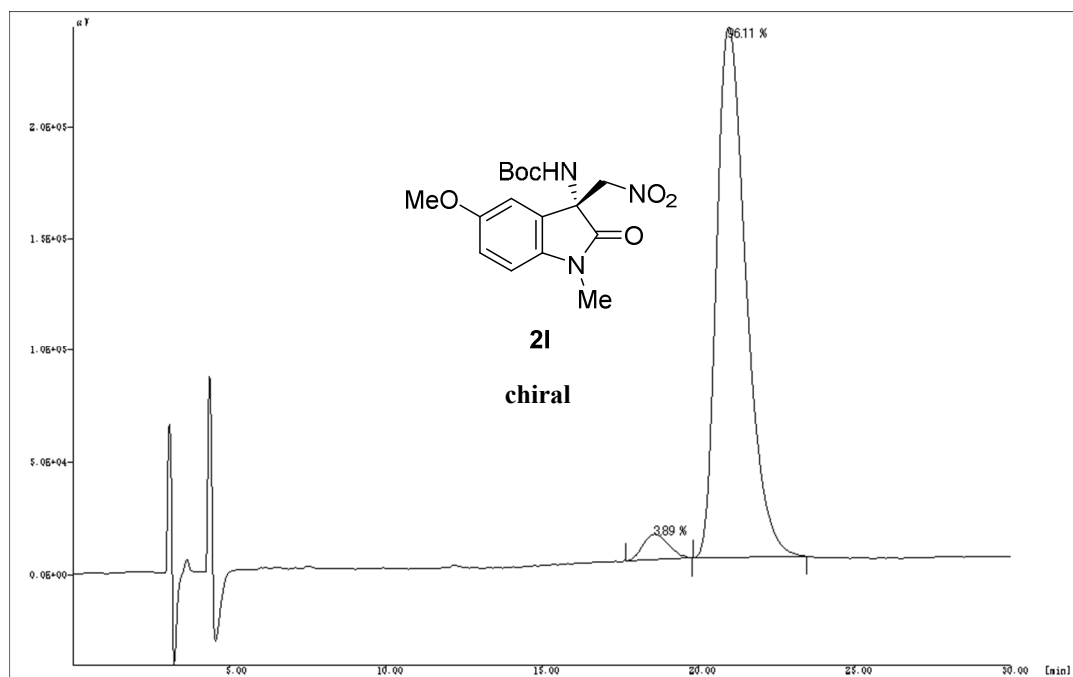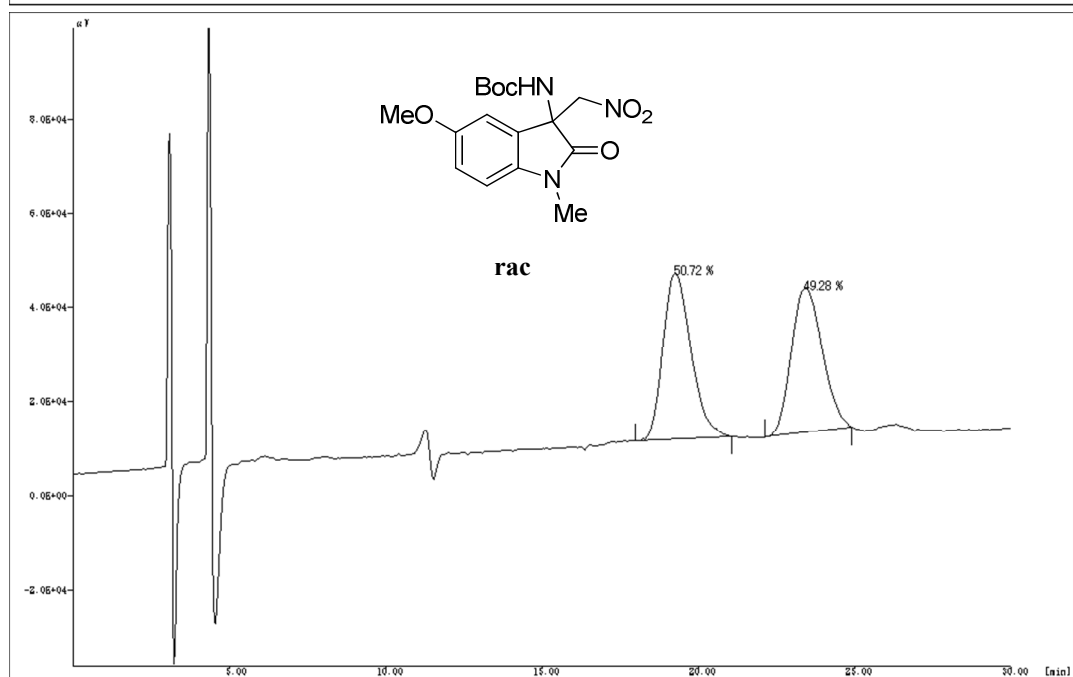

Chiralcel OD-H column (hexane:2-propanol= 90:10, 1.0 ml/min, 254 nm)

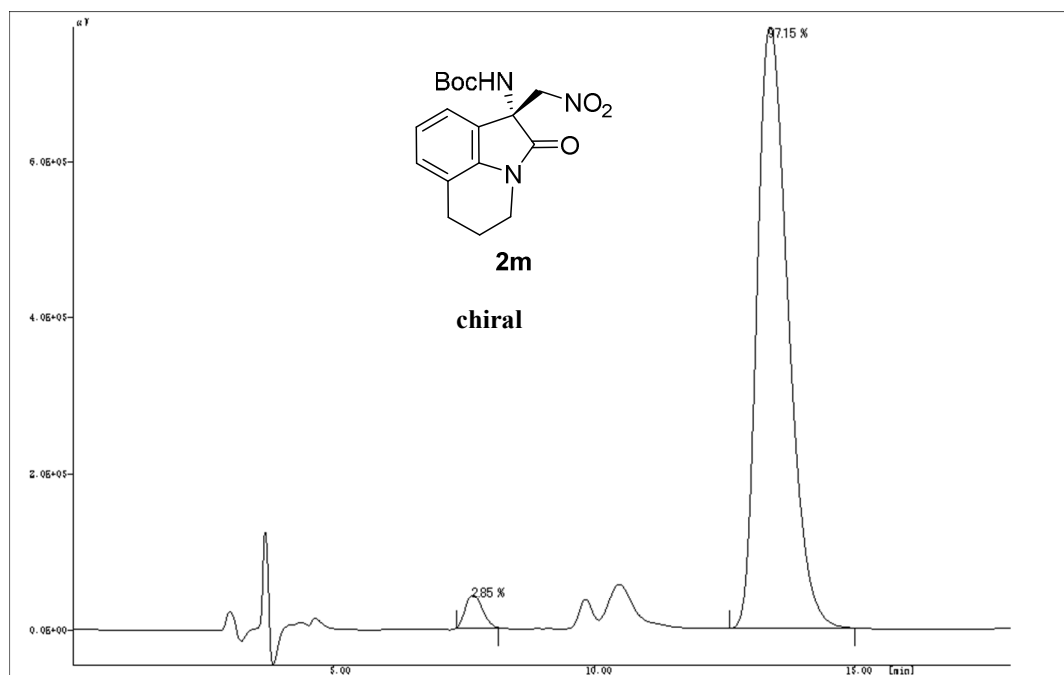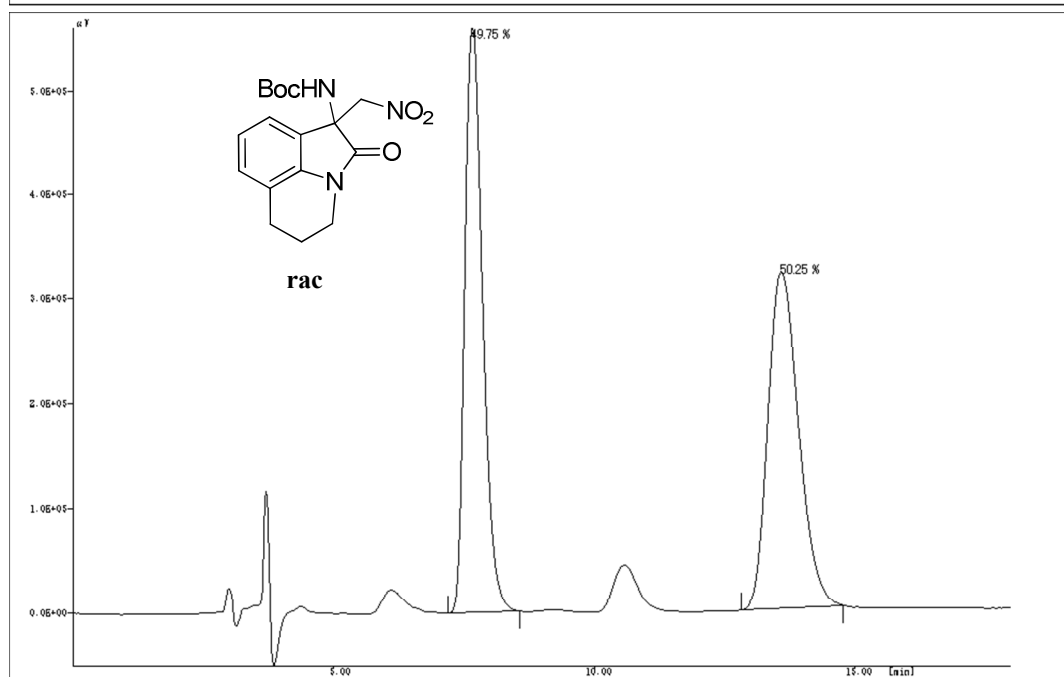

Chiralcel OD-H column (hexane:2-propanol= 80:20, 1.0 ml/min, 254 nm)

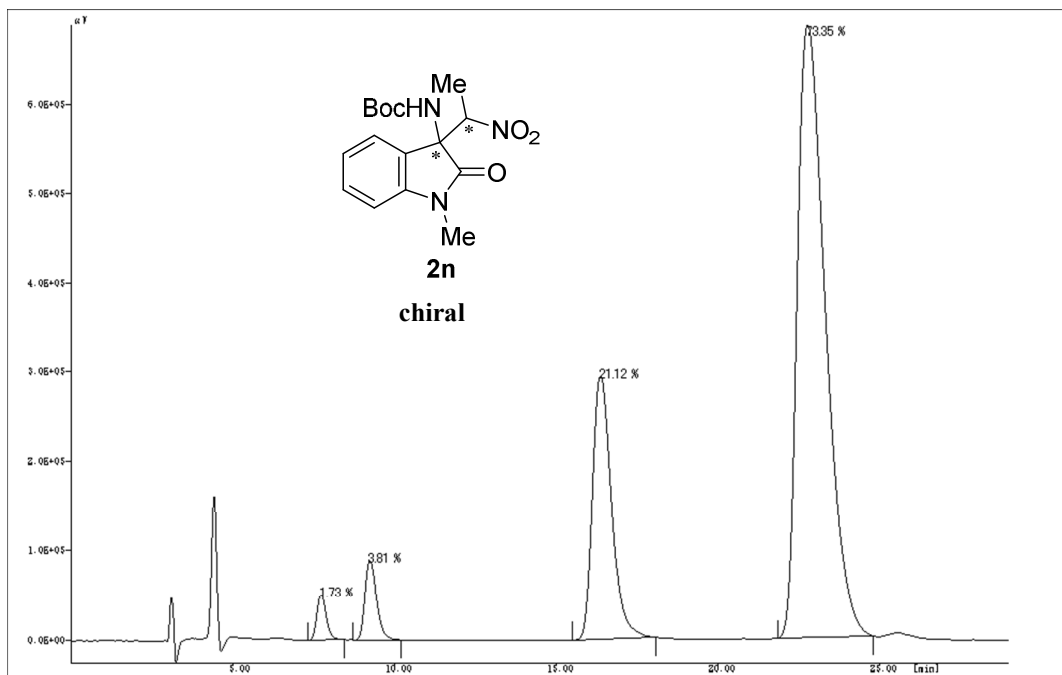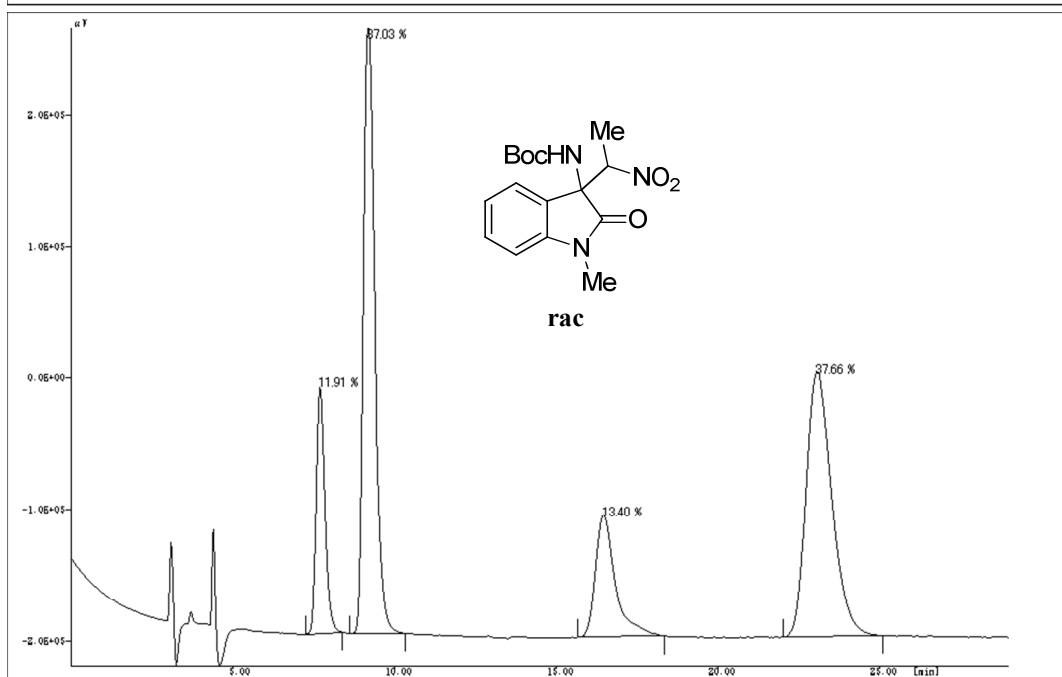

Chiralcel OD-H column (hexane:2-propanol= 90:10, 1.0 ml/min, 254 nm)

Product obtained by reduction of **2a** (Scheme 3)

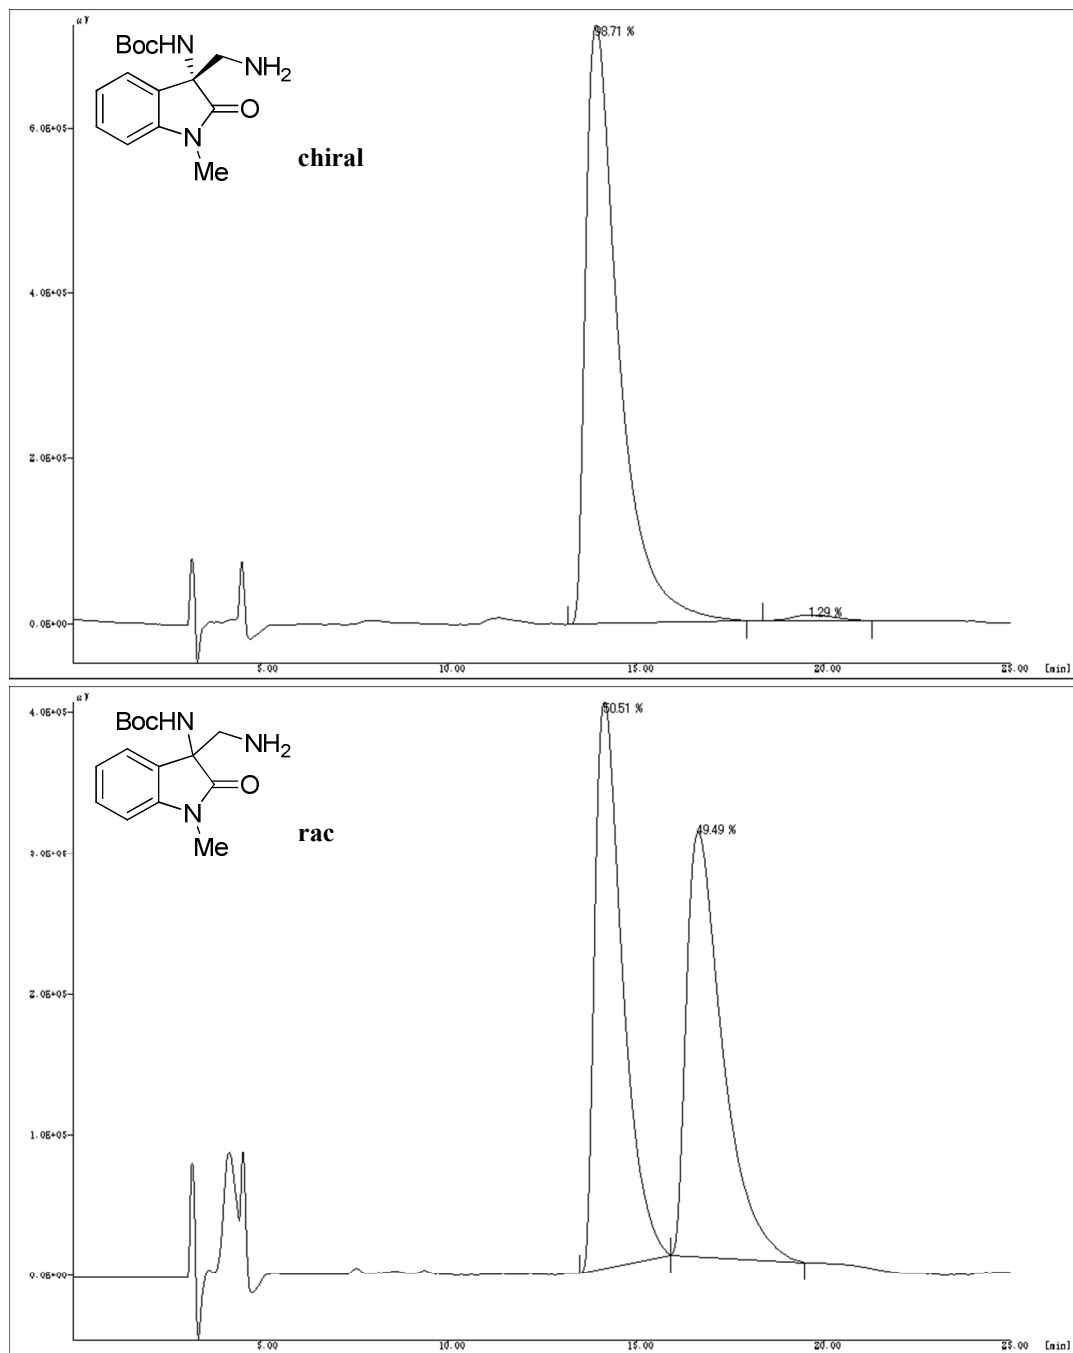

Chiralpak AS-H column (hexane:2-propanol= 90:10, 1.0 ml/min, 254 nm)

Product obtained by deprotection of Boc group from **2g** (Scheme 3)

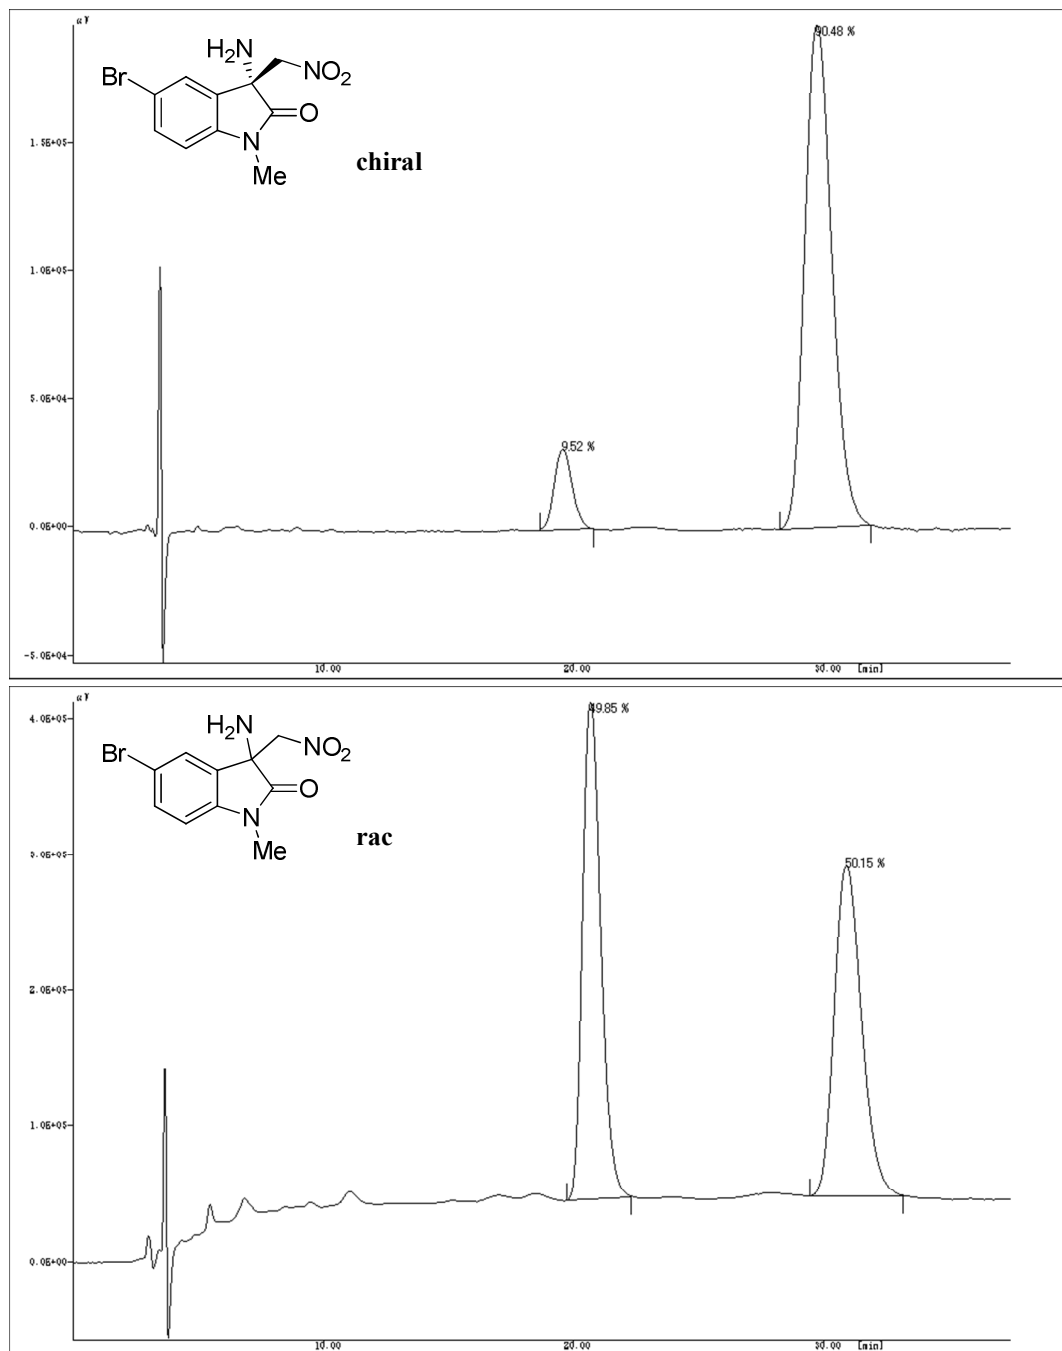

Chiralcel OD-H column (hexane:2-propanol= 70:30, 1.0 ml/min, 254 nm)
